# Supplementary material for: Carbazole-based gold(i) complexes with alkyl chains of different lengths: tunable solid-state fluorescence, aggregation-induced emission (AIE), and reversible mechanochromism characteristics
Source: Royal Society of Chemistry journal article supplement (doi:10.1039/c5ra19378h), 2015-01-01

## **Electronic Supplementary Information (ESI)**

### **Carbazole-Based Gold(I) Complexes with Alkyl Chains of Different Lengths: Tunable Solid-State Fluorescence, Aggregation-Induced Emission (AIE), and Reversible Mechanochromism Characteristics**

*Zhao Chen, Lan Yang, Yuxuan Hu, Di Wu, Jun Yin\*, Guang-Ao Yu and Sheng Hua Liu\**

Key Laboratory of Pesticide and Chemical Biology, Ministry of Education, College of Chemistry, Central China Normal University, Wuhan 430079, P. R. China

Tel: +86-27-67867725      Fax: +86-27-67867725

Corresponding author E-mail: [yinj@mail.ccnu.edu.cn](mailto:yinj@mail.ccnu.edu.cn); [chshliu@mail.ccnu.edu.cn](mailto:chshliu@mail.ccnu.edu.cn)

## TABLE OF CONTENTS

|                                                |            |
|------------------------------------------------|------------|
| 1. Figs. S1-S37.....                           | <b>S3</b>  |
| 2. Tables S1-S10.....                          | <b>S19</b> |
| 3. Copies of NMR spectra and Mass spectra..... | <b>S37</b> |

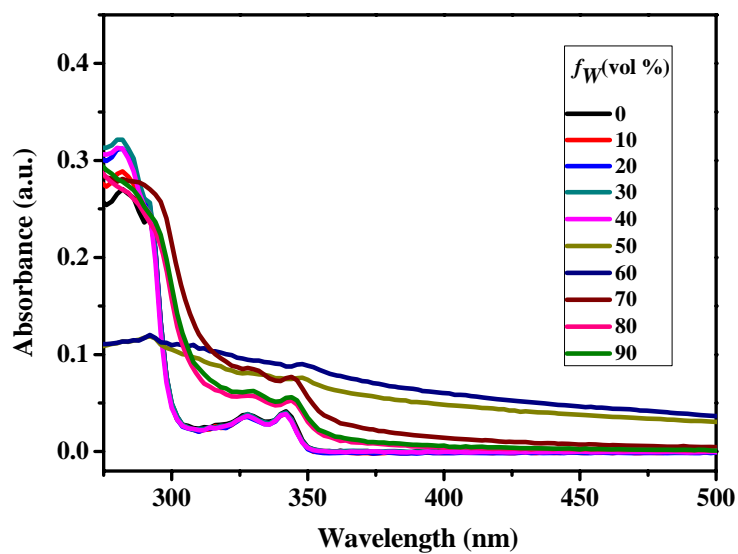

**Fig. S1** UV spectra of complex **1** ( $1.0 \times 10^{-5} \text{ mol L}^{-1}$ ) in DMF-water mixtures with various water contents (0-90%).

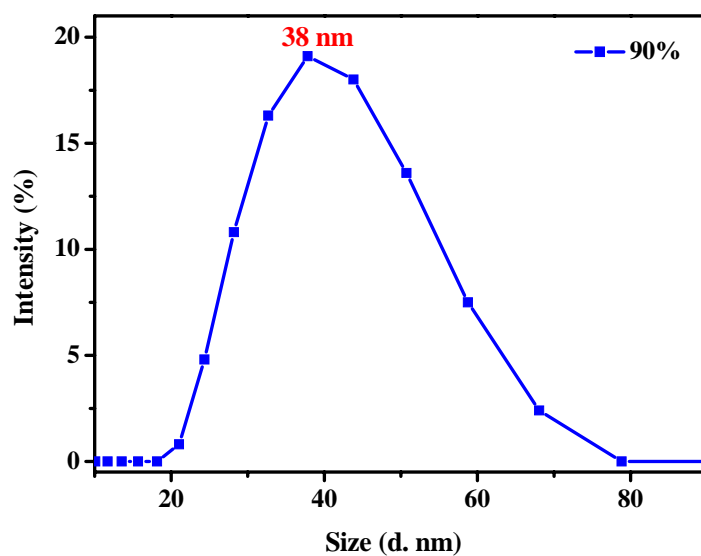

**Fig. S2** Size distribution curve of complex **1** ( $1.0 \times 10^{-5} \text{ mol L}^{-1}$ ) in DMF-water mixtures with 90% volume fraction of water.

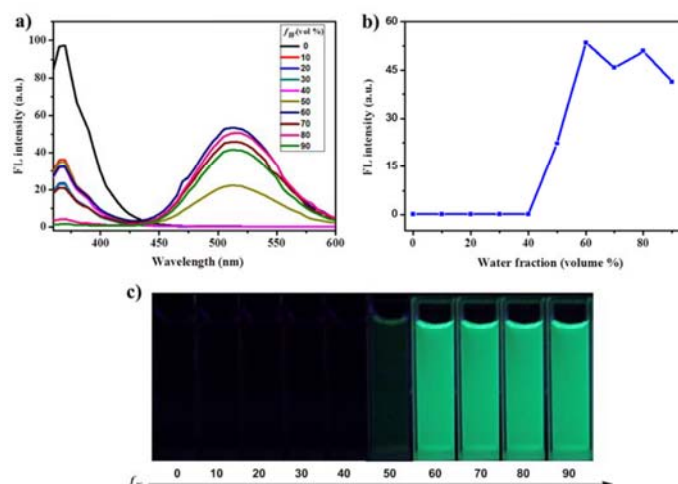

**Fig. S3** PL spectra of the dilute solutions of luminogen **2** ( $1.0 \times 10^{-5}$  mol L<sup>-1</sup>) in DMF-H<sub>2</sub>O mixtures with different water fractions ( $f_w$ ). Excitation wavelength = 330 nm. (b) Changes in the emission intensity of **2** at 515 nm in DMF-H<sub>2</sub>O mixtures with various volume fractions of water (0-90%). (c) The fluorescence images of **2** (concentration:  $1.0 \times 10^{-5}$  mol L<sup>-1</sup>) in diverse DMF-H<sub>2</sub>O mixtures with various  $f_w$  values (0-90%) under 365 nm UV irradiation.

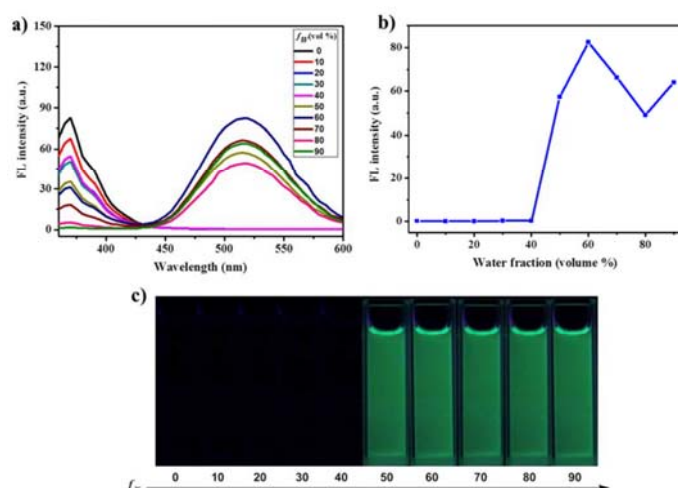

**Fig. S4** (a) PL spectra of the dilute solutions of luminogen **3** ( $1.0 \times 10^{-5}$  mol L<sup>-1</sup>) in DMF-H<sub>2</sub>O mixtures with different water fractions ( $f_w$ ). Excitation wavelength = 330 nm. (b) Changes in the emission intensity of **3** at 515 nm in DMF-H<sub>2</sub>O mixtures with various volume fractions of water (0-90%). (c) The fluorescence images of **3** (concentration:  $1.0 \times 10^{-5}$  mol L<sup>-1</sup>) in diverse DMF-H<sub>2</sub>O mixtures with various  $f_w$  values (0-90%) under 365 nm UV irradiation.

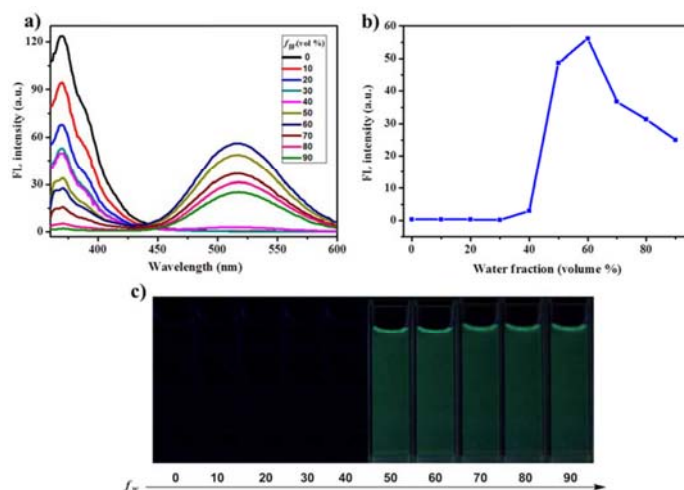

**Fig. S5** (a) PL spectra of the dilute solutions of luminogen **4** ( $1.0 \times 10^{-5}$  mol L<sup>-1</sup>) in DMF-H<sub>2</sub>O mixtures with different water fractions ( $f_w$ ). Excitation wavelength = 330 nm. (b) Changes in the emission intensity of **4** at 516 nm in DMF-H<sub>2</sub>O mixtures with various volume fractions of water (0-90%). (c) The fluorescence images of **4** (concentration:  $1.0 \times 10^{-5}$  mol L<sup>-1</sup>) in diverse DMF-H<sub>2</sub>O mixtures with various  $f_w$  values (0-90%) under 365 nm UV irradiation.

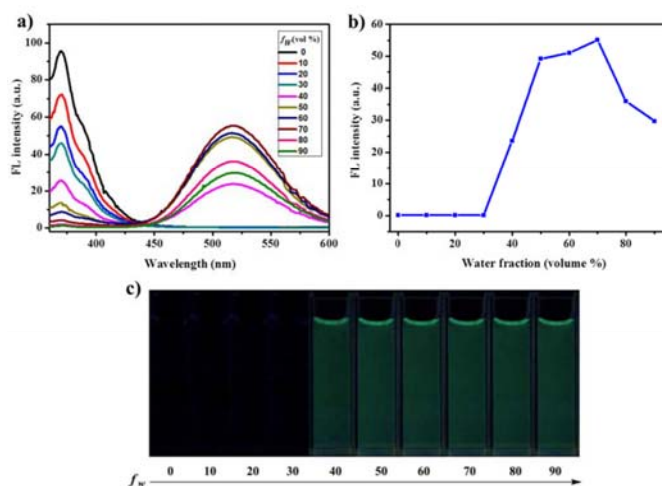

**Fig. S6** (a) PL spectra of the dilute solutions of luminogen **5** ( $1.0 \times 10^{-5}$  mol L<sup>-1</sup>) in DMF-H<sub>2</sub>O mixtures with different water fractions ( $f_w$ ). Excitation wavelength = 330 nm. (b) Changes in the emission intensity of **5** at 520 nm in DMF-H<sub>2</sub>O mixtures with various volume fractions of water (0-90%). (c) The fluorescence images of **5** (concentration:  $1.0 \times 10^{-5}$  mol L<sup>-1</sup>) in diverse DMF-H<sub>2</sub>O mixtures with various  $f_w$  values (0-90%) under 365 nm UV irradiation.

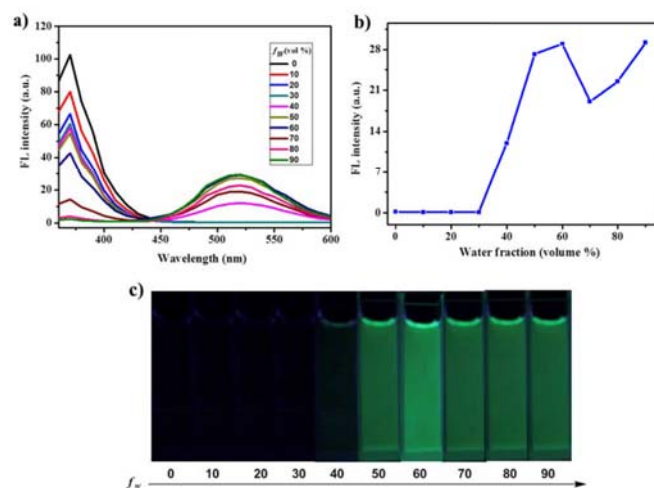

**Fig. S7** (a) PL spectra of the dilute solutions of luminogen **6** ( $1.0 \times 10^{-5} \text{ mol L}^{-1}$ ) in DMF-H<sub>2</sub>O mixtures with different water fractions ( $f_w$ ). Excitation wavelength = 330 nm. (b) Changes in the emission intensity of **6** at 520 nm in DMF-H<sub>2</sub>O mixtures with various volume fractions of water (0-90%). (c) The fluorescence images of **6** (concentration:  $1.0 \times 10^{-5} \text{ mol L}^{-1}$ ) in diverse DMF-H<sub>2</sub>O mixtures with various  $f_w$  values (0-90%) under 365 nm UV irradiation.

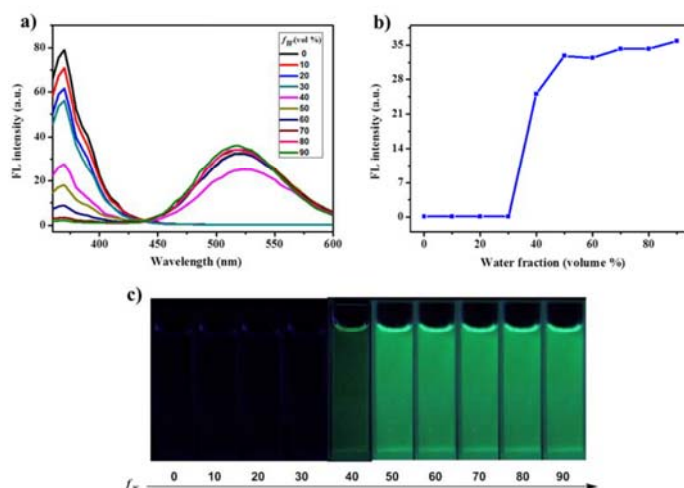

**Fig. S8** (a) PL spectra of the dilute solutions of luminogen **7** ( $1.0 \times 10^{-5} \text{ mol L}^{-1}$ ) in DMF-H<sub>2</sub>O mixtures with different water fractions ( $f_w$ ). Excitation wavelength = 330 nm. (b) Changes in the emission intensity of **7** at 520 nm in DMF-H<sub>2</sub>O mixtures with various volume fractions of water (0-90%). (c) The fluorescence images of **7** (concentration:  $1.0 \times 10^{-5} \text{ mol L}^{-1}$ ) in diverse DMF-H<sub>2</sub>O mixtures with various  $f_w$  values (0-90%) under 365 nm UV irradiation.

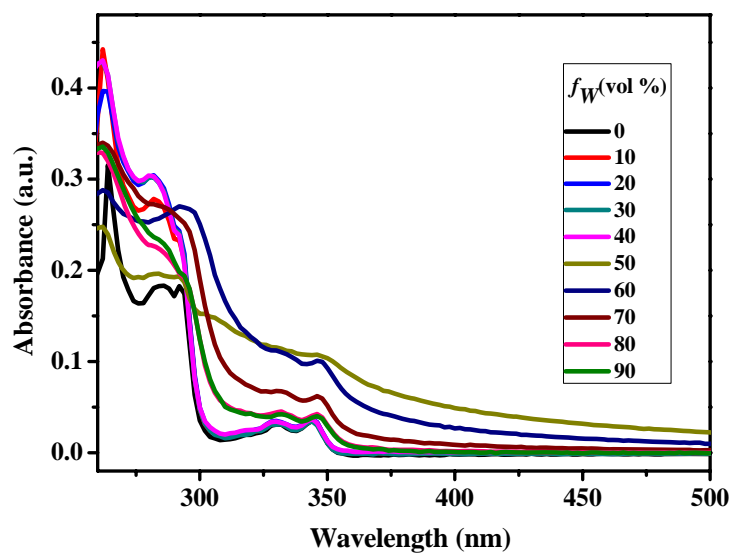

**Fig. S9** UV spectra of complex **2** ( $1.0 \times 10^{-5} \text{ mol L}^{-1}$ ) in DMF-water mixtures with various water contents (0-90%).

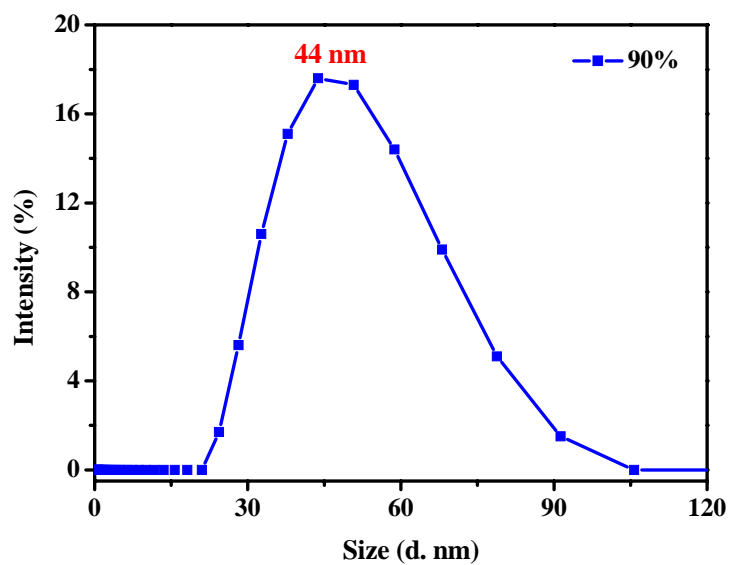

**Fig. S10** Size distribution curve of complex **2** ( $1.0 \times 10^{-5} \text{ mol L}^{-1}$ ) in DMF-water mixtures with 90% volume fraction of water.

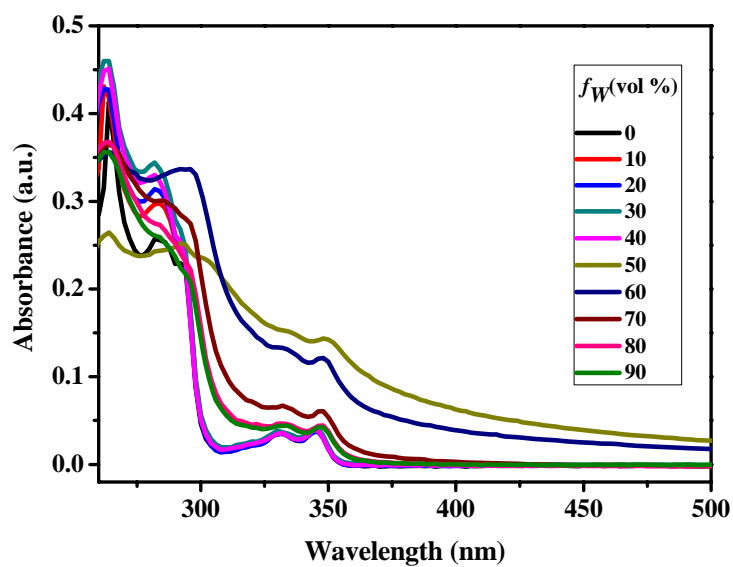

**Fig. S11** UV spectra of complex **3** ( $1.0 \times 10^{-5} \text{ mol L}^{-1}$ ) in DMF-water mixtures with various water contents (0-90%).

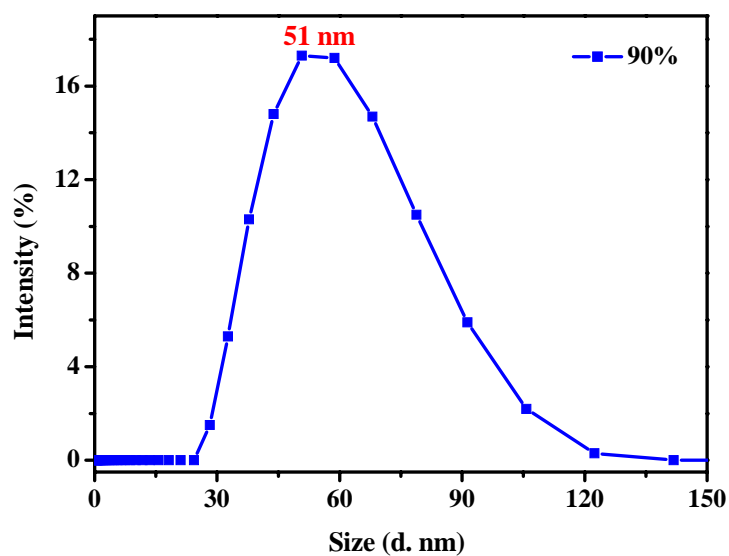

**Fig. S12** Size distribution curve of complex **3** ( $1.0 \times 10^{-5} \text{ mol L}^{-1}$ ) in DMF-water mixtures with 90% volume fraction of water.



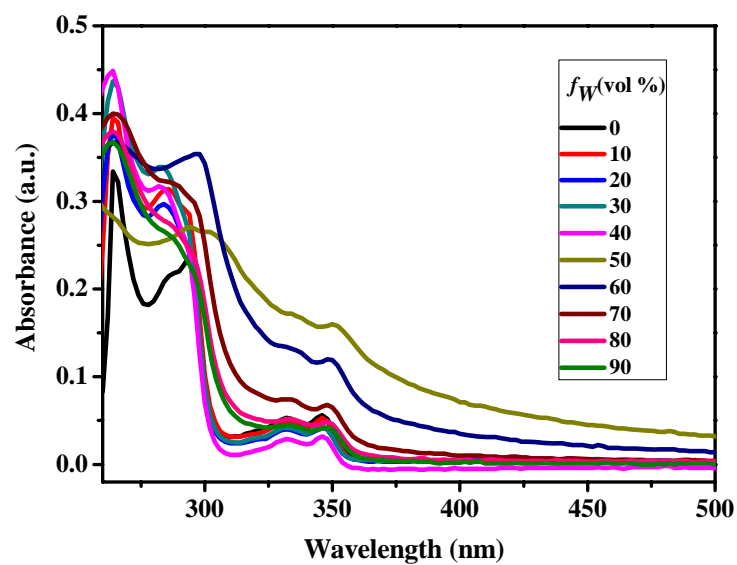

**Fig. S13** UV spectra of complex **4** ( $1.0 \times 10^{-5} \text{ mol L}^{-1}$ ) in DMF-water mixtures with various water contents (0-90%).

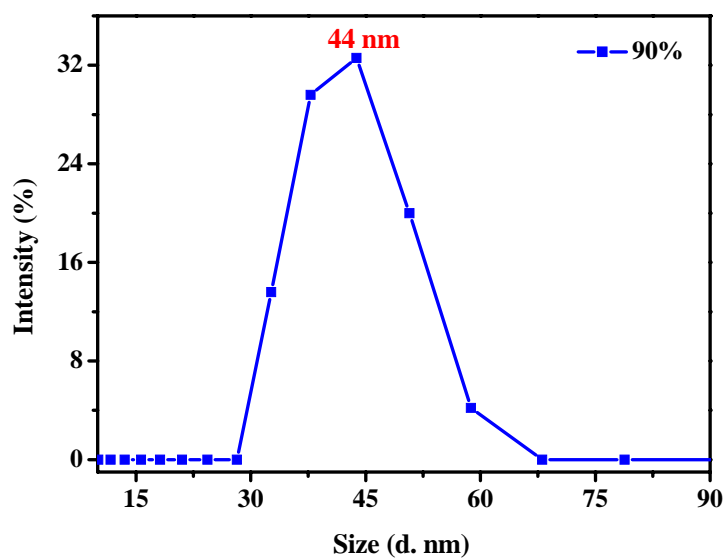

**Fig. S14** Size distribution curve of complex **4** ( $1.0 \times 10^{-5} \text{ mol L}^{-1}$ ) in DMF-water mixtures with 90% volume fraction of water.

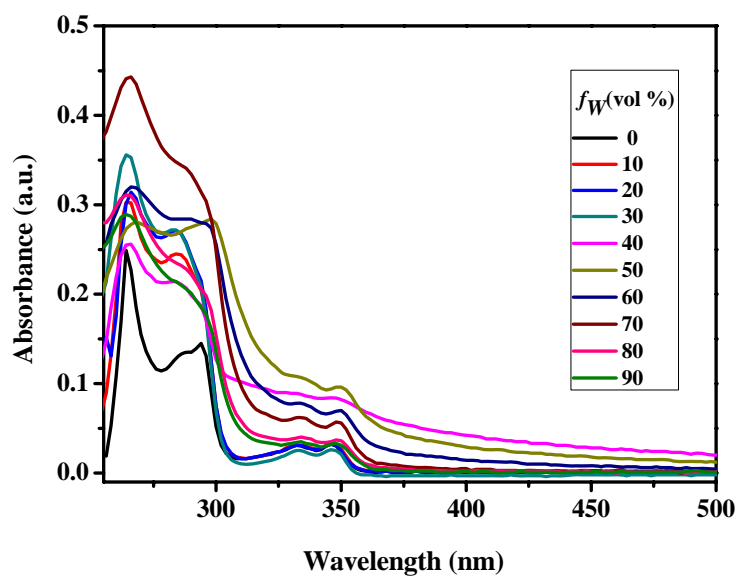

**Fig. S15** UV spectra of complex **5** ( $1.0 \times 10^{-5} \text{ mol L}^{-1}$ ) in DMF-water mixtures with various water contents (0-90%).

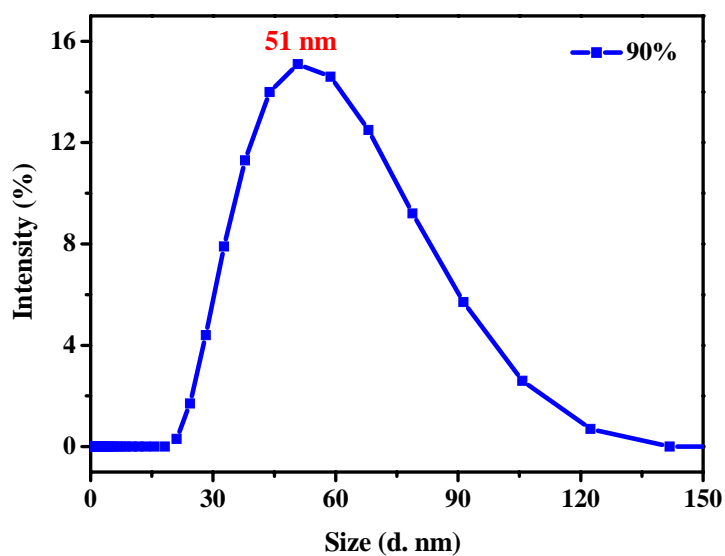

**Fig. S16** Size distribution curve of complex **5** ( $1.0 \times 10^{-5} \text{ mol L}^{-1}$ ) in DMF-water mixtures with 90% volume fraction of water.

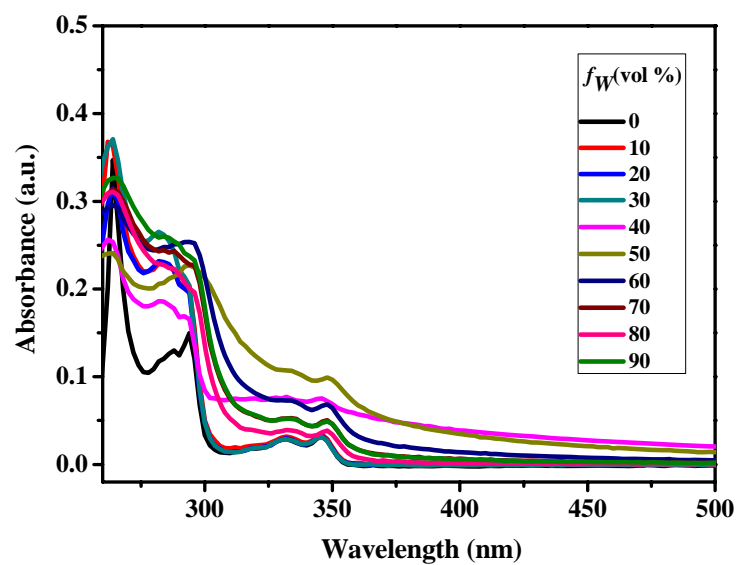

**Fig. S17** UV spectra of complex **6** ( $1.0 \times 10^{-5} \text{ mol L}^{-1}$ ) in DMF-water mixtures with various water contents (0-90%).

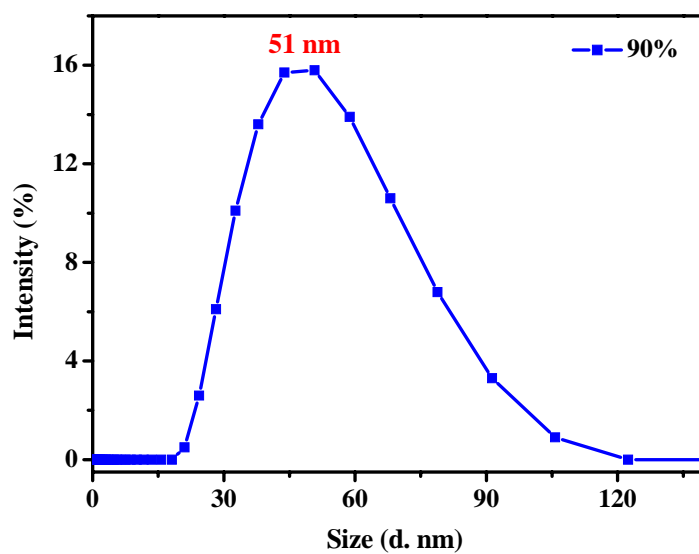

**Fig. S18** Size distribution curve of complex **6** ( $1.0 \times 10^{-5} \text{ mol L}^{-1}$ ) in DMF-water mixtures with 90% volume fraction of water.

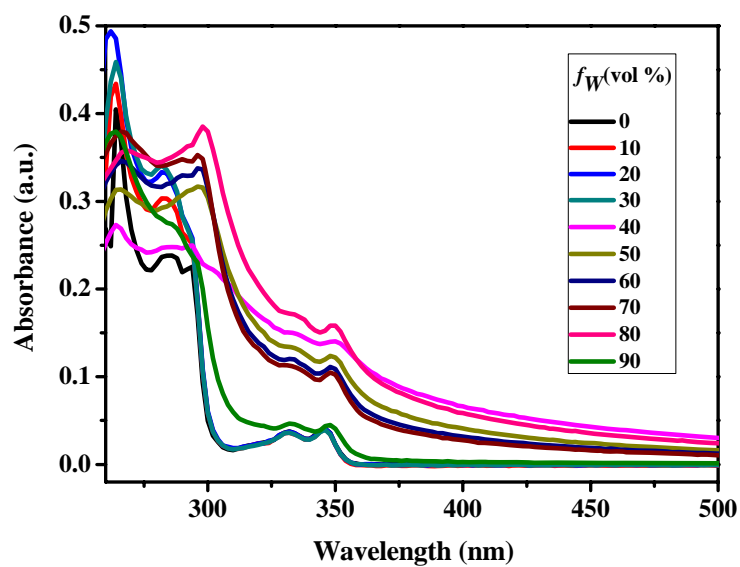

**Fig. S19** UV spectra of complex **7** ( $1.0 \times 10^{-5} \text{ mol L}^{-1}$ ) in DMF-water mixtures with various water contents (0-90%).

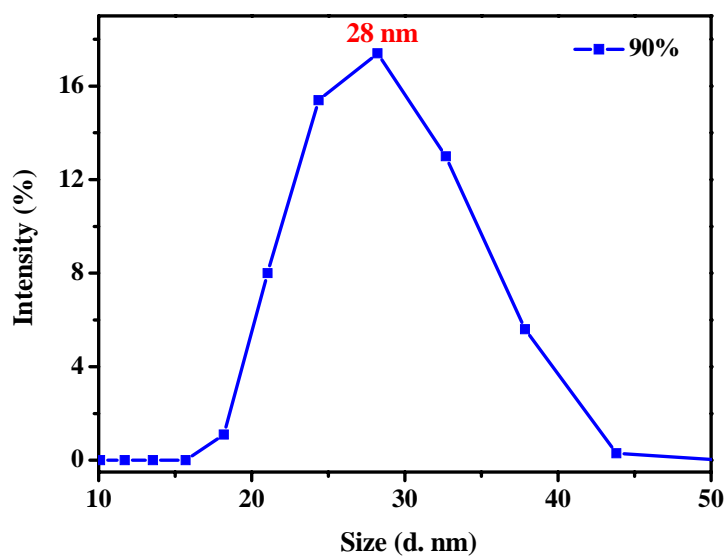

**Fig. S20** Size distribution curve of complex **7** ( $1.0 \times 10^{-5} \text{ mol L}^{-1}$ ) in DMF-water mixtures with 90% volume fraction of water.

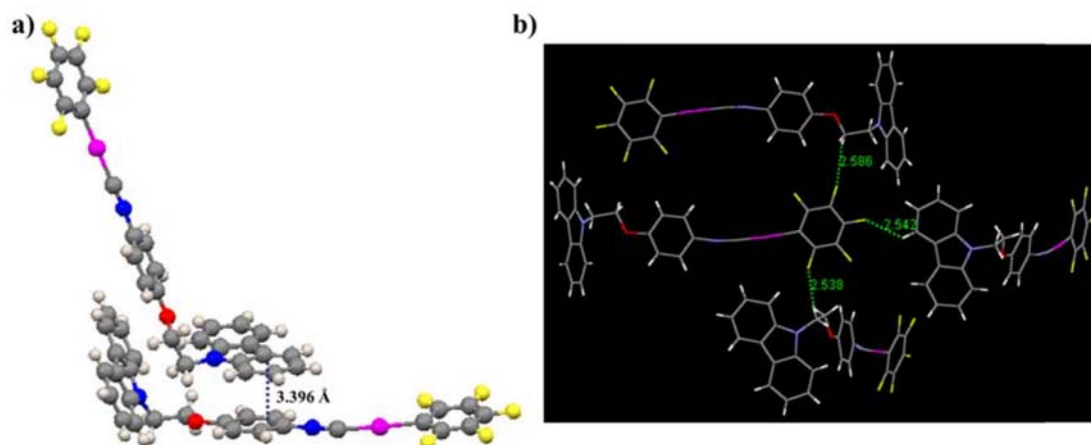

**Fig. S21** a) Crystal packing diagram of complex **1**. It showed weak intermolecular  $\pi \cdots \pi$  interaction; b) Crystal packing diagram of complex **1**. It showed weak intermolecular C-H $\cdots$ F interactions.

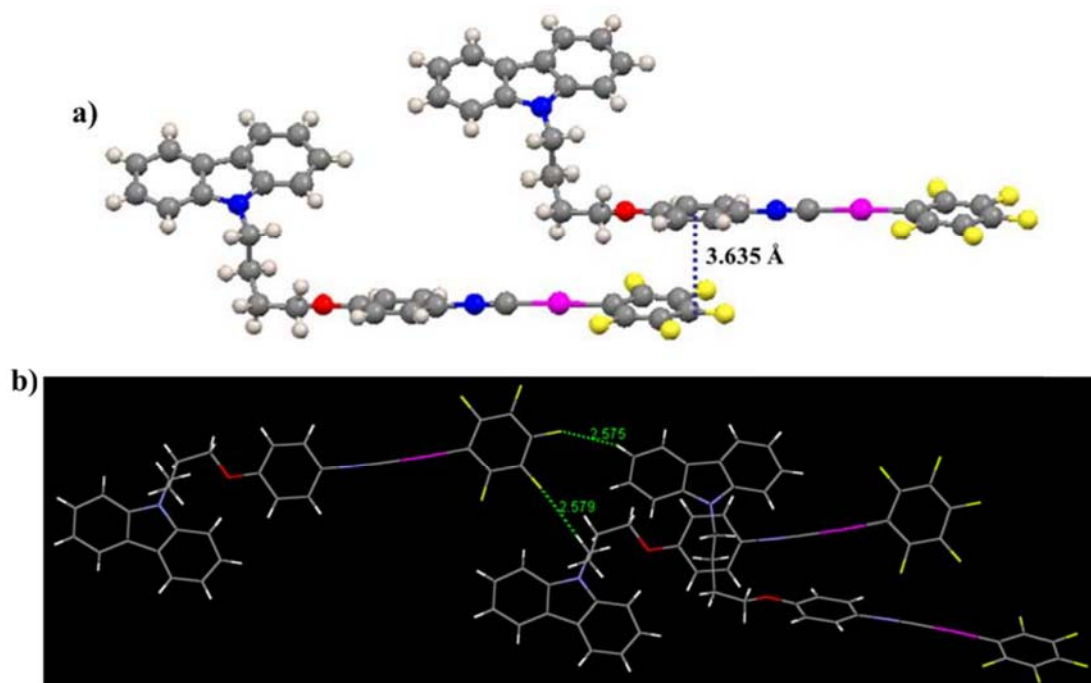

**Fig. S22** a) Crystal packing diagram of complex **3**. It showed weak intermolecular  $\pi \cdots \pi$  interaction; b) Crystal packing diagram of complex **3**. It showed weak intermolecular C-H $\cdots$ F interactions.

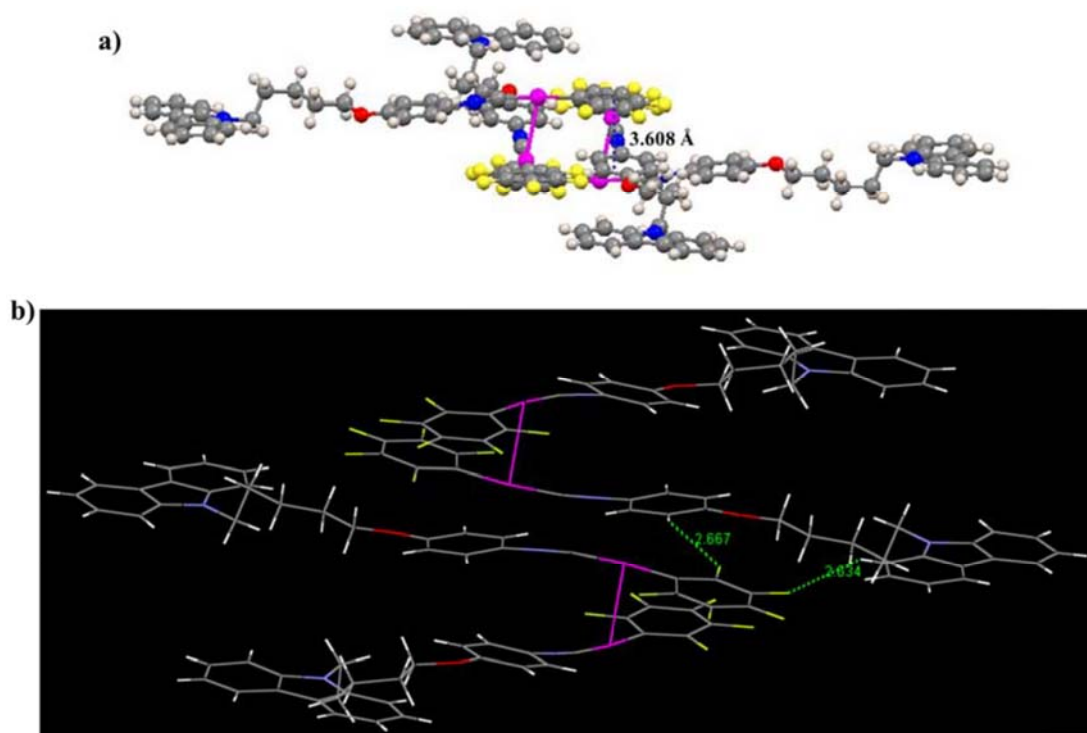

**Fig. S23** a) Crystal packing diagram of complex **4**. It showed weak intermolecular  $\pi \cdots \pi$  interaction; b) Crystal packing diagram of complex **4**. It showed weak intermolecular C-H $\cdots$ F interactions.

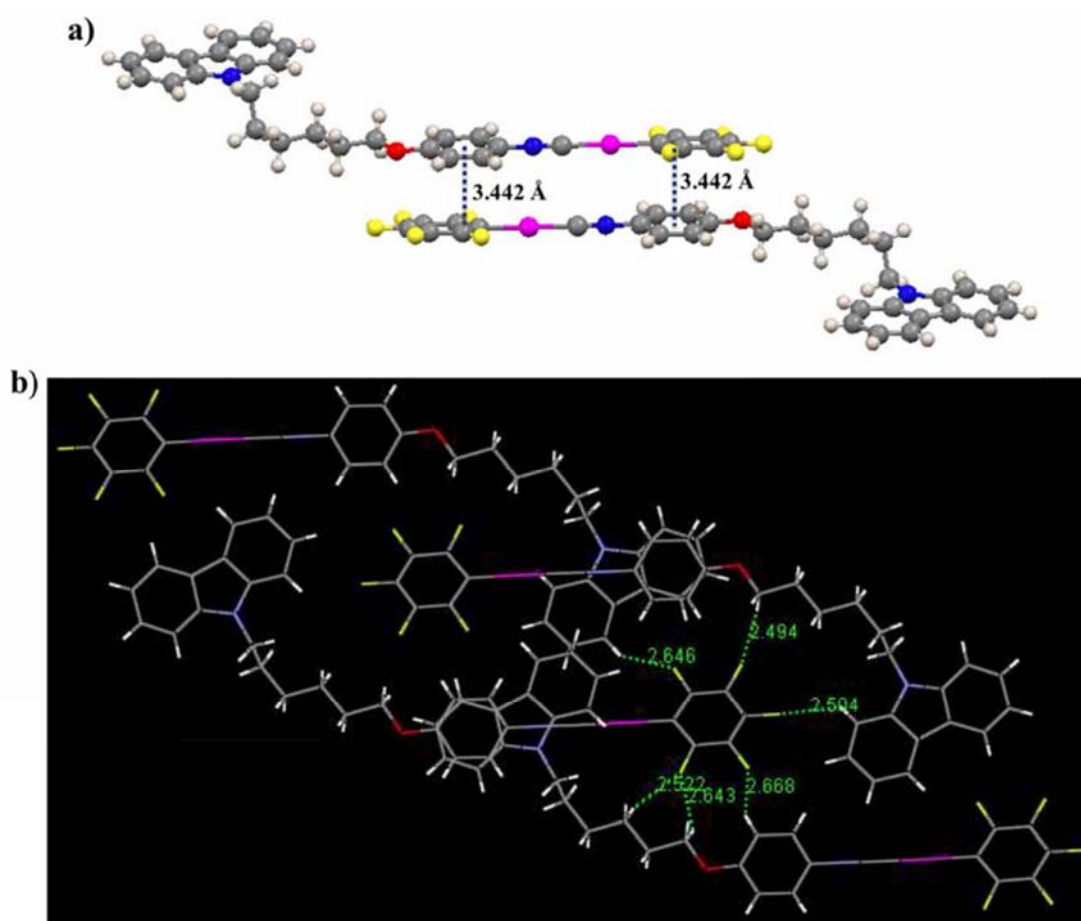

**Fig. S24** a) Crystal packing diagram of complex **5**. It showed weak intermolecular  $\pi \cdots \pi$  interaction; b) Crystal packing diagram of complex **5**. It showed weak intermolecular C-H $\cdots$ F interactions.

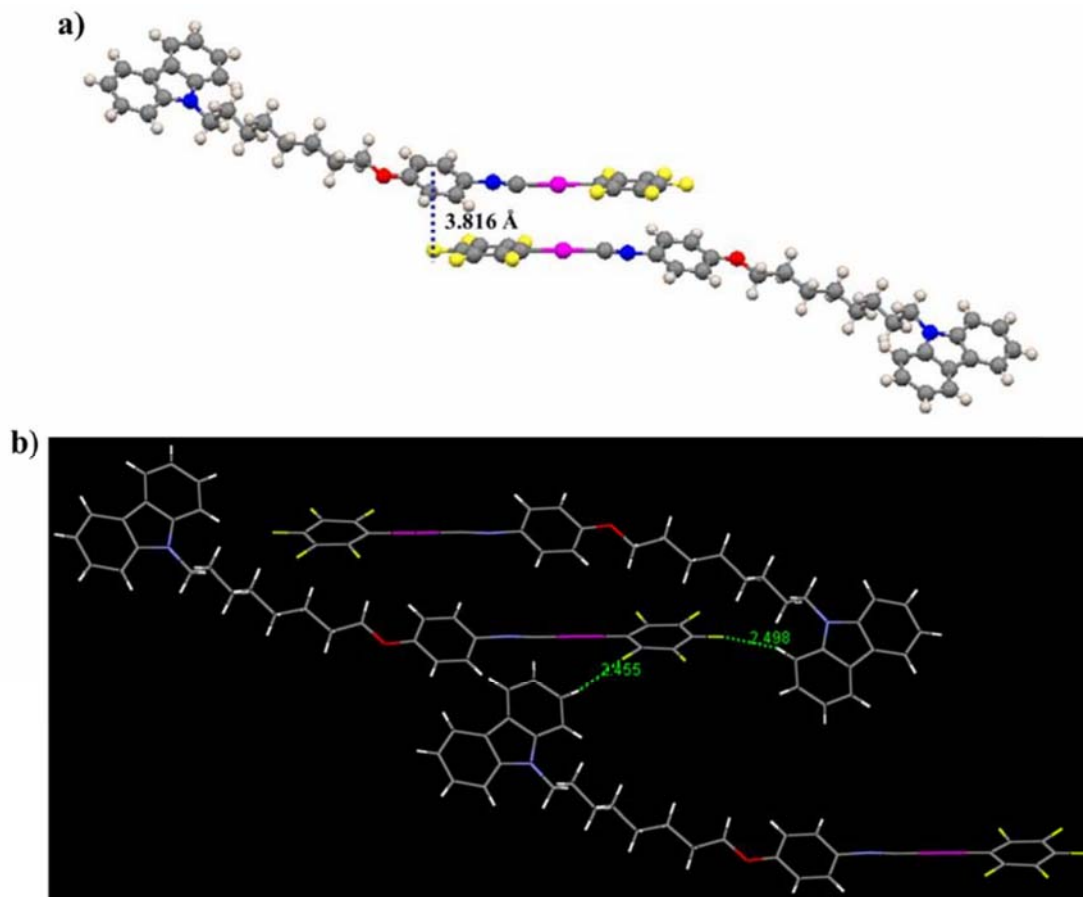

**Fig. S25** a) Crystal packing diagram of complex **7**. It showed weak intermolecular  $\pi \cdots \pi$  interaction; b) Crystal packing diagram of complex **7**. It showed weak intermolecular C-H $\cdots$ F interactions.

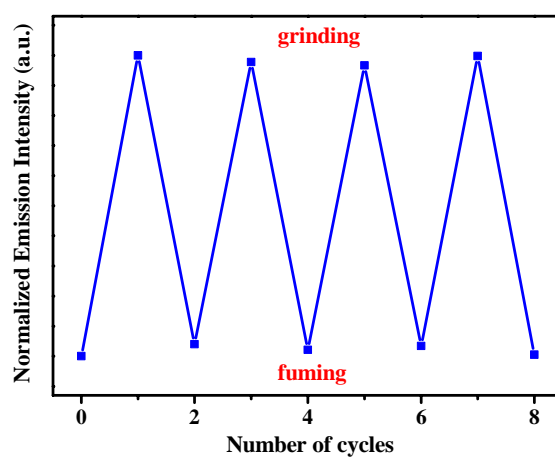

**Fig. S26** Invertible grinding-fuming processes of the photoluminescence of complex **1** at 511 nm.

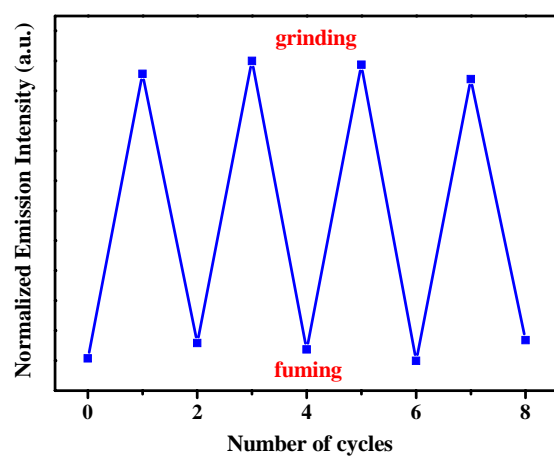

**Fig. S27** Invertible grinding-fuming processes of the photoluminescence of complex **2** at 511 nm.

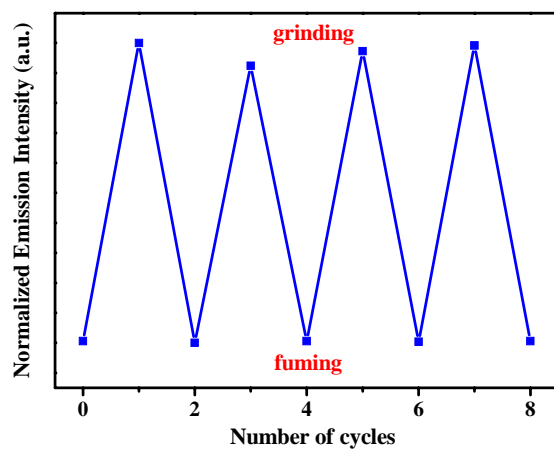

**Fig. S28** Invertible grinding-fuming processes of the photoluminescence of complex **3** at 513 nm.

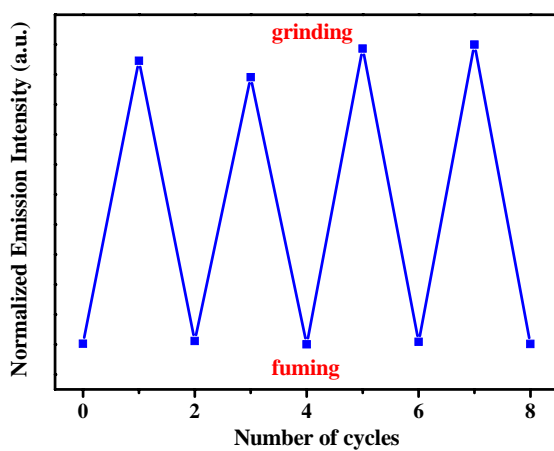

**Fig. S29** Invertible grinding-fuming processes of the photoluminescence of complex **4** at 513 nm.



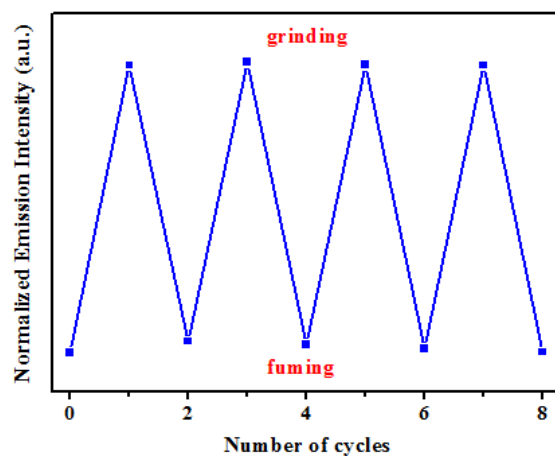

**Fig. S30** Invertible grinding-fuming processes of the photoluminescence of complex **5** at 513 nm.

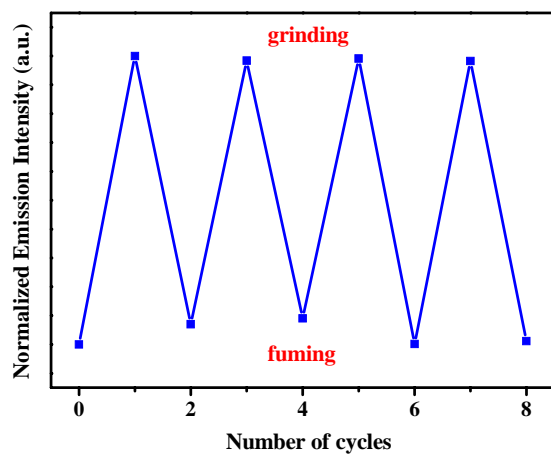

**Fig. S31** Invertible grinding-fuming processes of the photoluminescence of complex **6** at 513 nm.

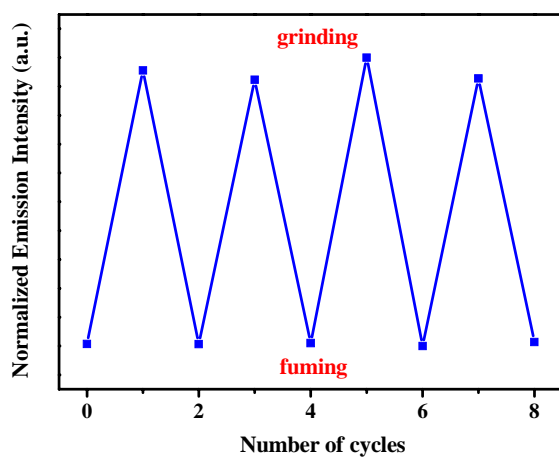

**Fig. S32** Invertible grinding-fuming processes of the photoluminescence of complex **7** at 515 nm.

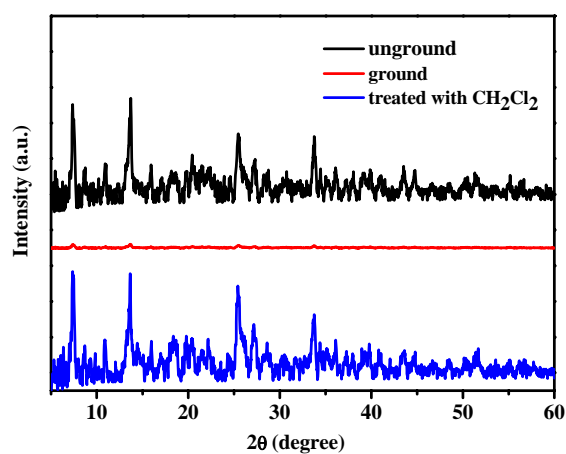

**Fig. S33** XRD patterns of complex 2: unground, ground and after treatment with dichloromethane.

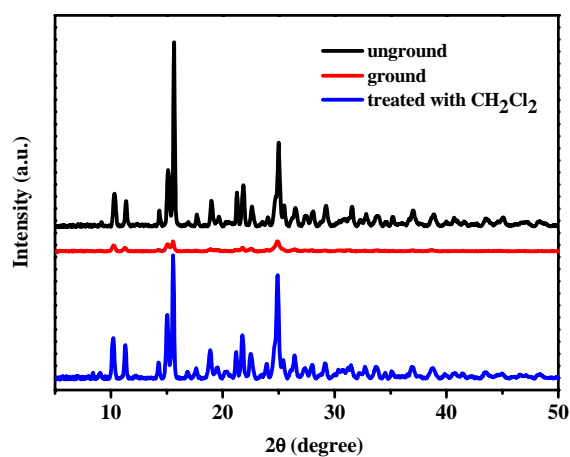

**Fig. S34** XRD patterns of complex 3: unground, ground and after treatment with dichloromethane.

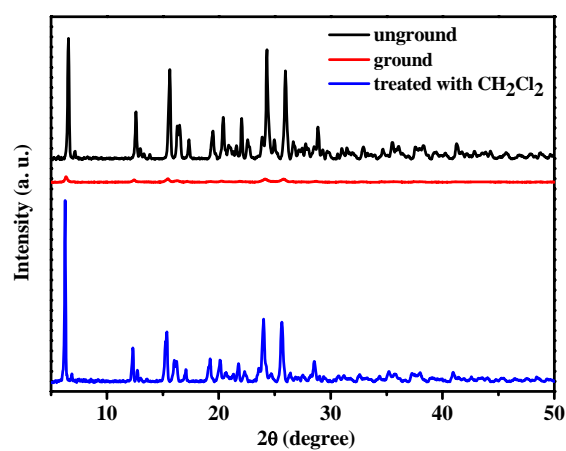

**Fig. S35** XRD patterns of complex 5: unground, ground and after treatment with dichloromethane.

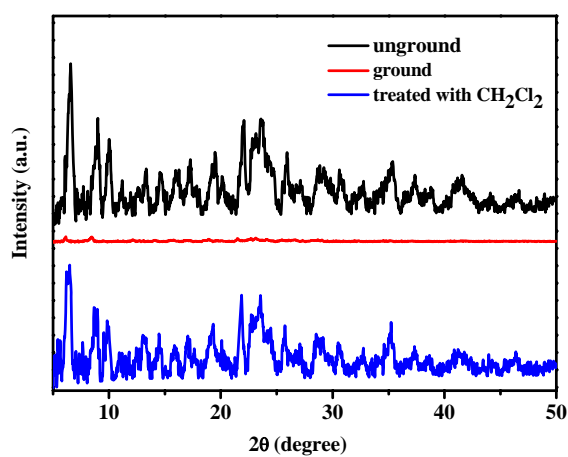

**Fig. S36** XRD patterns of complex **6**: unground, ground and after treatment with dichloromethane.

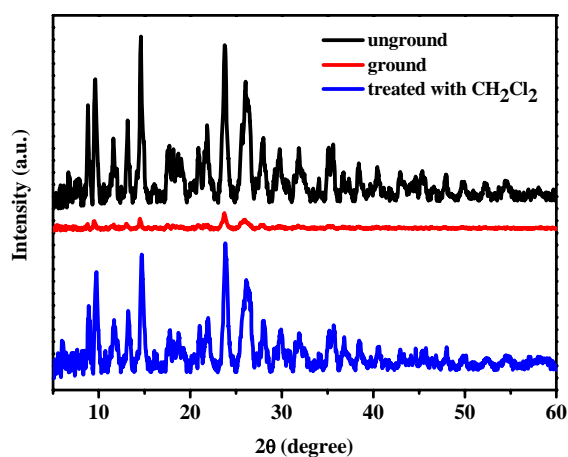

**Fig. S37** XRD patterns of complex **7**: unground, ground and after treatment with dichloromethane.

**Table S1.** Structure determination summary for the complex **1**.

|                   |                                                                                                     |
|-------------------|-----------------------------------------------------------------------------------------------------|
| Empirical formula | C <sub>54.50</sub> H <sub>33</sub> Au <sub>2</sub> Cl F <sub>10</sub> N <sub>4</sub> O <sub>2</sub> |
| Formula weight    | 1395.23                                                                                             |
| Temperature (K)   | 298(2)                                                                                              |
| Crystal system    | Monoclinic                                                                                          |
| Space group       | C2/c                                                                                                |
| <i>a</i> (Å)      | 28.924(4)                                                                                           |
| <i>b</i> (Å)      | 8.5750(11)                                                                                          |
| <i>c</i> (Å)      | 40.421(5)                                                                                           |
| <i>α</i> (deg)    | 90                                                                                                  |
| <i>β</i> (deg)    | 102.003(2)                                                                                          |

|                                                         |                                                                    |
|---------------------------------------------------------|--------------------------------------------------------------------|
| $\gamma$ (deg)                                          | 90                                                                 |
| $V$ ( $\text{\AA}^3$ )                                  | 9806(2)                                                            |
| Z                                                       | 8                                                                  |
| Absorption coefficient ( $\text{mm}^{-1}$ )             | 6.117                                                              |
| F (000)                                                 | 5352                                                               |
| Theta range for data collection (deg)                   | 1.03 to 25.98                                                      |
| Index ranges                                            | $-34 \leq h \leq 35$ , $-10 \leq k \leq 10$ , $-49 \leq l \leq 49$ |
| Reflections collected/unique                            | 35964/ 9571<br>( $R_{\text{int}} = 0.0458$ )                       |
| Final R indices [ $I > 2\sigma(I)$ ]                    | $R_1 = 0.0523$ , $wR_2 = 0.1456$                                   |
| R indices (all data)                                    | $R_1 = 0.0870$ , $wR_2 = 0.1718$                                   |
| Goodness-of-fit on $F^2$                                | 1.050                                                              |
| Largest difference peak and hole (e $\text{\AA}^{-3}$ ) | 1.191, -1.070                                                      |

**Table S2.** Structure determination summary for the complex **3**.

|                                             |                                                                    |
|---------------------------------------------|--------------------------------------------------------------------|
| Empirical formula                           | $\text{C}_{29} \text{H}_{20} \text{Au F}_5 \text{N}_2 \text{O}$    |
| Formula weight                              | 704.44                                                             |
| Temperature (K)                             | 298(2)                                                             |
| Crystal system                              | Monoclinic                                                         |
| Space group                                 | $P2(1)/c$                                                          |
| $a$ ( $\text{\AA}$ )                        | 10.4570(17)                                                        |
| $b$ ( $\text{\AA}$ )                        | 22.475(4)                                                          |
| $c$ ( $\text{\AA}$ )                        | 11.8269(19)                                                        |
| $\alpha$ (deg)                              | 90                                                                 |
| $\beta$ (deg)                               | 115.490(2)                                                         |
| $\gamma$ (deg)                              | 90                                                                 |
| $V$ ( $\text{\AA}^3$ )                      | 2509.1(7)                                                          |
| Z                                           | 4                                                                  |
| Absorption coefficient ( $\text{mm}^{-1}$ ) | 5.927                                                              |
| F (000)                                     | 1360                                                               |
| Theta range for data collection (deg)       | 1.81 to 30.83                                                      |
| Index ranges                                | $-14 \leq h \leq 15$ , $-30 \leq k \leq 32$ , $-16 \leq l \leq 16$ |
| Reflections collected/unique                | 25560/ 7797<br>( $R_{\text{int}} = 0.0461$ )                       |
| Final R indices [ $I > 2\sigma(I)$ ]        | $R_1 = 0.0450$ , $wR_2 = 0.1151$                                   |

|                                                          |                              |
|----------------------------------------------------------|------------------------------|
| R indices (all data)                                     | $R_1=0.0758$ , $wR_2=0.1301$ |
| Goodness-of-fit on $F^2$                                 | 1.019                        |
| Largest difference peak and hole( $e \text{ \AA}^{-3}$ ) | 1.303, -2.091                |

**Table S3.** Structure determination summary for the complex **4**.

|                                                          |                                                                    |
|----------------------------------------------------------|--------------------------------------------------------------------|
| Empirical formula                                        | $C_{30} H_{22} Au F_5 N_2 O$                                       |
| Formula weight                                           | 718.46                                                             |
| Temperature (K)                                          | 298(2)                                                             |
| Crystal system                                           | Monoclinic                                                         |
| Space group                                              | $C2/c$                                                             |
| $a$ ( $\text{\AA}$ )                                     | 18.208(4)                                                          |
| $b$ ( $\text{\AA}$ )                                     | 17.298(3)                                                          |
| $c$ ( $\text{\AA}$ )                                     | 16.458(3)                                                          |
| $\alpha$ (deg)                                           | 90                                                                 |
| $\beta$ (deg)                                            | 99.525(3)                                                          |
| $\gamma$ (deg)                                           | 90                                                                 |
| $V$ ( $\text{\AA}^3$ )                                   | 5112.1(17)                                                         |
| $Z$                                                      | 8                                                                  |
| Absorption coefficient ( $\text{mm}^{-1}$ )              | 5.820                                                              |
| $F(000)$                                                 | 2784                                                               |
| Theta range for data collection (deg)                    | 1.63 to 25.00                                                      |
| Index ranges                                             | $-21 \leq h \leq 19$ , $-20 \leq k \leq 20$ , $-19 \leq l \leq 19$ |
| Reflections collected/unique                             | 15327/ 4447<br>( $R_{\text{int}}=0.0575$ )                         |
| Final R indices [ $I > 2\sigma(I)$ ]                     | $R_1=0.0610$ , $wR_2=0.1675$                                       |
| R indices (all data)                                     | $R_1=0.0809$ , $wR_2=0.1871$                                       |
| Goodness-of-fit on $F^2$                                 | 1.051                                                              |
| Largest difference peak and hole( $e \text{ \AA}^{-3}$ ) | 2.111, -1.248                                                      |

**Table S4.** Structure determination summary for the complex **5**.

|                   |                              |
|-------------------|------------------------------|
| Empirical formula | $C_{31} H_{24} Au F_5 N_2 O$ |
| Formula weight    | 732.49                       |
| Temperature (K)   | 295(2)                       |

|                                                      |                                                                 |
|------------------------------------------------------|-----------------------------------------------------------------|
| Crystal system                                       | Triclinic                                                       |
| Space group                                          | P-1                                                             |
| <i>a</i> (Å)                                         | 7.6240(11)                                                      |
| <i>b</i> (Å)                                         | 13.6244(18)                                                     |
| <i>c</i> (Å)                                         | 14.516(2)                                                       |
| $\alpha$ (deg)                                       | 102.723(2)                                                      |
| $\beta$ (deg)                                        | 100.056(2)                                                      |
| $\gamma$ (deg)                                       | 105.814(2)                                                      |
| <i>V</i> (Å <sup>3</sup> )                           | 1370.2(3)                                                       |
| Z                                                    | 2                                                               |
| Absorption coefficient (mm <sup>-1</sup> )           | 5.430                                                           |
| F (000)                                              | 712                                                             |
| Theta range for data collection (deg)                | 1.49 to 26.00                                                   |
| Index ranges                                         | -9<= <i>h</i> <=9, -16<= <i>k</i> <=16, -17<= <i>l</i> <=17     |
| Reflections collected/unique                         | 10466/5355<br>( <i>R</i> <sub>int</sub> = 0.0328)               |
| Final R indices [ <i>I</i> >2σ( <i>I</i> )]          | <i>R</i> <sub>1</sub> = 0.0366, <i>wR</i> <sub>2</sub> = 0.1131 |
| R indices (all data)                                 | <i>R</i> <sub>1</sub> = 0.0414, <i>wR</i> <sub>2</sub> = 0.1207 |
| Goodness-of-fit on <i>F</i> <sup>2</sup>             | 1.103                                                           |
| Largest difference peak and hole(e Å <sup>-3</sup> ) | 0.851, -1.692                                                   |

**Table S5.** Structure determination summary for the complex **7**.

|                                            |                                                                    |
|--------------------------------------------|--------------------------------------------------------------------|
| Empirical formula                          | C <sub>33</sub> H <sub>28</sub> Au F <sub>5</sub> N <sub>2</sub> O |
| Formula weight                             | 760.54                                                             |
| Temperature (K)                            | 273(2)                                                             |
| Crystal system                             | Monoclinic                                                         |
| Space group                                | C2/c                                                               |
| <i>a</i> (Å)                               | 19.127(3)                                                          |
| <i>b</i> (Å)                               | 7.5247(11)                                                         |
| <i>c</i> (Å)                               | 41.685(7)                                                          |
| $\alpha$ (deg)                             | 90                                                                 |
| $\beta$ (deg)                              | 101.562(2)                                                         |
| $\gamma$ (deg)                             | 90                                                                 |
| <i>V</i> (Å <sup>3</sup> )                 | 5877.8(15)                                                         |
| Z                                          | 8                                                                  |
| Absorption coefficient (mm <sup>-1</sup> ) | 5.067                                                              |

|                                                         |                                                   |
|---------------------------------------------------------|---------------------------------------------------|
| F (000)                                                 | 2976                                              |
| Theta range for data collection<br>(deg)                | 2.17 to 26.00                                     |
| Index ranges                                            | -23<=h<=22, -9<=k<=9, -51<=l<=51                  |
| Reflections collected/unique                            | 19498/ 5747<br>(R <sub>int</sub> = 0.0831)        |
| Final R indices [I>2sigma(I)]                           | R <sub>1</sub> = 0.0928, wR <sub>2</sub> = 0.2082 |
| R indices (all data)                                    | R <sub>1</sub> = 0.1197, wR <sub>2</sub> = 0.2232 |
| Goodness-of-fit on F <sup>2</sup>                       | 1.184                                             |
| Largest difference peak and hole(e<br>Å <sup>-3</sup> ) | 1.519, -2.178                                     |

**Table S6.** Bond lengths [Å] and angles [°] of **1**.

|             |           |              |           |
|-------------|-----------|--------------|-----------|
| Au(1)-C(7)  | 1.948(11) | C(11)-O(1)   | 1.395(11) |
| Au(1)-C(1)  | 2.038(9)  | C(12)-C(13)  | 1.359(14) |
| Au(1)-Au(2) | 3.4073(7) | C(12)-H(12)  | 0.9300    |
| Au(2)-C(34) | 1.942(11) | C(13)-H(13)  | 0.9300    |
| Au(2)-C(28) | 1.997(10) | C(14)-O(1)   | 1.400(11) |
| C(1)-C(3)   | 1.371(13) | C(14)-C(15)  | 1.491(14) |
| C(1)-C(2)   | 1.374(15) | C(14)-H(14A) | 0.9700    |
| C(2)-F(5)   | 1.317(13) | C(14)-H(14B) | 0.9700    |
| C(2)-C(6)   | 1.410(17) | C(15)-N(2)   | 1.477(12) |
| C(3)-C(4)   | 1.347(15) | C(15)-H(15A) | 0.9700    |
| C(3)-F(1)   | 1.369(12) | C(15)-H(15B) | 0.9700    |
| C(4)-C(5)   | 1.314(16) | C(16)-N(2)   | 1.366(12) |
| C(4)-F(2)   | 1.388(12) | C(16)-C(17)  | 1.409(13) |
| C(5)-C(6)   | 1.338(17) | C(16)-C(21)  | 1.413(13) |
| C(5)-F(3)   | 1.348(12) | C(17)-C(18)  | 1.369(18) |
| C(6)-F(4)   | 1.333(13) | C(17)-H(17)  | 0.9300    |
| C(7)-N(1)   | 1.162(13) | C(18)-C(19)  | 1.35(2)   |
| C(8)-C(9)   | 1.369(16) | C(18)-H(18)  | 0.9300    |
| C(8)-C(13)  | 1.412(16) | C(19)-C(20)  | 1.401(18) |
| C(8)-N(1)   | 1.418(13) | C(19)-H(19)  | 0.9300    |
| C(9)-C(10)  | 1.357(15) | C(20)-C(21)  | 1.400(15) |
| C(9)-H(9)   | 0.9300    | C(20)-H(20)  | 0.9300    |
| C(10)-C(11) | 1.391(14) | C(21)-C(22)  | 1.448(14) |
| C(10)-H(10) | 0.9300    | C(22)-C(23)  | 1.374(15) |
| C(11)-C(12) | 1.352(14) | C(22)-C(27)  | 1.383(14) |

|              |           |                   |           |
|--------------|-----------|-------------------|-----------|
| C(23)-C(24)  | 1.37(2)   | C(42)-H(42A)      | 0.9700    |
| C(23)-H(23)  | 0.9300    | C(42)-H(42B)      | 0.9700    |
| C(24)-C(25)  | 1.37(2)   | C(43)-N(4)        | 1.380(11) |
| C(24)-H(24)  | 0.9300    | C(43)-C(44)       | 1.385(16) |
| C(25)-C(26)  | 1.449(19) | C(43)-C(48)       | 1.391(14) |
| C(25)-H(25)  | 0.9300    | C(44)-C(45)       | 1.431(15) |
| C(26)-C(27)  | 1.392(14) | C(44)-H(44)       | 0.9300    |
| C(26)-H(26)  | 0.9300    | C(45)-C(46)       | 1.388(18) |
| C(27)-N(2)   | 1.383(10) | C(45)-H(45)       | 0.9300    |
| C(28)-C(33)  | 1.358(16) | C(46)-C(47)       | 1.37(2)   |
| C(28)-C(29)  | 1.397(17) | C(46)-H(46)       | 0.9300    |
| C(29)-F(6)   | 1.348(15) | C(47)-C(48)       | 1.387(15) |
| C(29)-C(30)  | 1.412(16) | C(47)-H(47)       | 0.9300    |
| C(30)-F(7)   | 1.311(16) | C(48)-C(49)       | 1.447(16) |
| C(30)-C(31)  | 1.41(2)   | C(49)-C(54)       | 1.377(14) |
| C(31)-C(32)  | 1.33(2)   | C(49)-C(50)       | 1.398(17) |
| C(31)-F(8)   | 1.354(14) | C(50)-C(51)       | 1.42(2)   |
| C(32)-C(33)  | 1.354(18) | C(50)-H(50)       | 0.9300    |
| C(32)-F(9)   | 1.363(15) | C(51)-C(52)       | 1.38(2)   |
| C(33)-F(10)  | 1.384(16) | C(51)-H(51)       | 0.9300    |
| C(34)-N(3)   | 1.186(12) | C(52)-C(53)       | 1.387(17) |
| C(35)-C(40)  | 1.350(13) | C(52)-H(52)       | 0.9300    |
| C(35)-N(3)   | 1.372(13) | C(53)-C(54)       | 1.383(14) |
| C(35)-C(36)  | 1.383(14) | C(53)-H(53)       | 0.9300    |
| C(36)-C(37)  | 1.376(14) | C(54)-N(4)        | 1.408(12) |
| C(36)-H(36)  | 0.9300    | C(55)-Cl(1)#1     | 1.698(10) |
| C(37)-C(38)  | 1.362(13) | C(55)-Cl(1)       | 1.747(10) |
| C(37)-H(37)  | 0.9300    | C(55)-H(55A)      | 0.9700    |
| C(38)-O(2)   | 1.348(11) | C(55)-H(55B)      | 0.9700    |
| C(38)-C(39)  | 1.370(12) | Cl(1)-C(55)#1     | 1.698(10) |
| C(39)-C(40)  | 1.393(12) | C(7)-Au(1)-C(1)   | 176.0(4)  |
| C(39)-H(39)  | 0.9300    | C(7)-Au(1)-Au(2)  | 100.9(3)  |
| C(40)-H(40)  | 0.9300    | C(1)-Au(1)-Au(2)  | 80.8(2)   |
| C(41)-O(2)   | 1.415(10) | C(34)-Au(2)-C(28) | 177.1(4)  |
| C(41)-C(42)  | 1.490(13) | C(34)-Au(2)-Au(1) | 97.0(3)   |
| C(41)-H(41A) | 0.9700    | C(28)-Au(2)-Au(1) | 85.1(3)   |
| C(41)-H(41B) | 0.9700    | C(3)-C(1)-C(2)    | 114.8(9)  |
| C(42)-N(4)   | 1.471(10) | C(3)-C(1)-Au(1)   | 124.0(7)  |



|                    |           |                     |           |
|--------------------|-----------|---------------------|-----------|
| C(2)-C(1)-Au(1)    | 121.1(8)  | O(1)-C(14)-H(14B)   | 110.2     |
| F(5)-C(2)-C(1)     | 120.4(10) | C(15)-C(14)-H(14B)  | 110.2     |
| F(5)-C(2)-C(6)     | 117.7(11) | H(14A)-C(14)-H(14B) | 108.5     |
| C(1)-C(2)-C(6)     | 121.9(11) | N(2)-C(15)-C(14)    | 113.2(8)  |
| C(4)-C(3)-F(1)     | 118.1(10) | N(2)-C(15)-H(15A)   | 108.9     |
| C(4)-C(3)-C(1)     | 123.3(10) | C(14)-C(15)-H(15A)  | 108.9     |
| F(1)-C(3)-C(1)     | 118.5(9)  | N(2)-C(15)-H(15B)   | 108.9     |
| C(5)-C(4)-C(3)     | 120.3(10) | C(14)-C(15)-H(15B)  | 108.9     |
| C(5)-C(4)-F(2)     | 119.8(10) | H(15A)-C(15)-H(15B) | 107.8     |
| C(3)-C(4)-F(2)     | 119.8(11) | N(2)-C(16)-C(17)    | 128.5(9)  |
| C(4)-C(5)-C(6)     | 121.5(11) | N(2)-C(16)-C(21)    | 107.9(8)  |
| C(4)-C(5)-F(3)     | 119.9(12) | C(17)-C(16)-C(21)   | 123.5(10) |
| C(6)-C(5)-F(3)     | 118.5(13) | C(18)-C(17)-C(16)   | 115.7(12) |
| F(4)-C(6)-C(5)     | 124.4(12) | C(18)-C(17)-H(17)   | 122.1     |
| F(4)-C(6)-C(2)     | 117.5(12) | C(16)-C(17)-H(17)   | 122.1     |
| C(5)-C(6)-C(2)     | 118.0(11) | C(19)-C(18)-C(17)   | 123.3(13) |
| N(1)-C(7)-Au(1)    | 173.1(10) | C(19)-C(18)-H(18)   | 118.4     |
| C(9)-C(8)-C(13)    | 120.9(10) | C(17)-C(18)-H(18)   | 118.4     |
| C(9)-C(8)-N(1)     | 120.4(11) | C(18)-C(19)-C(20)   | 121.2(12) |
| C(13)-C(8)-N(1)    | 118.7(11) | C(18)-C(19)-H(19)   | 119.4     |
| C(10)-C(9)-C(8)    | 119.9(11) | C(20)-C(19)-H(19)   | 119.4     |
| C(10)-C(9)-H(9)    | 120.0     | C(19)-C(20)-C(21)   | 119.1(11) |
| C(8)-C(9)-H(9)     | 120.0     | C(19)-C(20)-H(20)   | 120.5     |
| C(9)-C(10)-C(11)   | 119.3(11) | C(21)-C(20)-H(20)   | 120.5     |
| C(9)-C(10)-H(10)   | 120.3     | C(20)-C(21)-C(16)   | 117.2(11) |
| C(11)-C(10)-H(10)  | 120.3     | C(20)-C(21)-C(22)   | 135.9(10) |
| C(12)-C(11)-C(10)  | 120.6(9)  | C(16)-C(21)-C(22)   | 106.9(8)  |
| C(12)-C(11)-O(1)   | 115.2(9)  | C(23)-C(22)-C(27)   | 121.1(11) |
| C(10)-C(11)-O(1)   | 124.2(10) | C(23)-C(22)-C(21)   | 132.6(11) |
| C(11)-C(12)-C(13)  | 121.6(11) | C(27)-C(22)-C(21)   | 106.3(8)  |
| C(11)-C(12)-H(12)  | 119.2     | C(24)-C(23)-C(22)   | 117.8(13) |
| C(13)-C(12)-H(12)  | 119.2     | C(24)-C(23)-H(23)   | 121.1     |
| C(12)-C(13)-C(8)   | 117.5(11) | C(22)-C(23)-H(23)   | 121.1     |
| C(12)-C(13)-H(13)  | 121.2     | C(25)-C(24)-C(23)   | 121.9(14) |
| C(8)-C(13)-H(13)   | 121.2     | C(25)-C(24)-H(24)   | 119.1     |
| O(1)-C(14)-C(15)   | 107.5(8)  | C(23)-C(24)-H(24)   | 119.0     |
| O(1)-C(14)-H(14A)  | 110.2     | C(24)-C(25)-C(26)   | 122.1(14) |
| C(15)-C(14)-H(14A) | 110.2     | C(24)-C(25)-H(25)   | 119.0     |

|                   |           |                     |           |
|-------------------|-----------|---------------------|-----------|
| C(26)-C(25)-H(25) | 119.0     | C(38)-C(39)-C(40)   | 120.0(8)  |
| C(27)-C(26)-C(25) | 113.3(12) | C(38)-C(39)-H(39)   | 120.0     |
| C(27)-C(26)-H(26) | 123.3     | C(40)-C(39)-H(39)   | 120.0     |
| C(25)-C(26)-H(26) | 123.3     | C(35)-C(40)-C(39)   | 120.2(9)  |
| N(2)-C(27)-C(22)  | 109.3(8)  | C(35)-C(40)-H(40)   | 119.9     |
| N(2)-C(27)-C(26)  | 127.1(10) | C(39)-C(40)-H(40)   | 119.9     |
| C(22)-C(27)-C(26) | 123.6(9)  | O(2)-C(41)-C(42)    | 107.7(8)  |
| C(33)-C(28)-C(29) | 112.6(11) | O(2)-C(41)-H(41A)   | 110.2     |
| C(33)-C(28)-Au(2) | 126.8(10) | C(42)-C(41)-H(41A)  | 110.2     |
| C(29)-C(28)-Au(2) | 120.6(9)  | O(2)-C(41)-H(41B)   | 110.2     |
| F(6)-C(29)-C(28)  | 121.5(10) | C(42)-C(41)-H(41B)  | 110.2     |
| F(6)-C(29)-C(30)  | 113.1(13) | H(41A)-C(41)-H(41B) | 108.5     |
| C(28)-C(29)-C(30) | 125.4(13) | N(4)-C(42)-C(41)    | 113.3(7)  |
| F(7)-C(30)-C(31)  | 122.3(13) | N(4)-C(42)-H(42A)   | 108.9     |
| F(7)-C(30)-C(29)  | 122.6(13) | C(41)-C(42)-H(42A)  | 108.9     |
| C(31)-C(30)-C(29) | 115.0(14) | N(4)-C(42)-H(42B)   | 108.9     |
| C(32)-C(31)-F(8)  | 121.7(17) | C(41)-C(42)-H(42B)  | 108.9     |
| C(32)-C(31)-C(30) | 120.9(11) | H(42A)-C(42)-H(42B) | 107.7     |
| F(8)-C(31)-C(30)  | 117.4(18) | N(4)-C(43)-C(44)    | 126.9(9)  |
| C(31)-C(32)-C(33) | 120.5(14) | N(4)-C(43)-C(48)    | 110.3(9)  |
| C(31)-C(32)-F(9)  | 117.4(14) | C(44)-C(43)-C(48)   | 122.8(10) |
| C(33)-C(32)-F(9)  | 122.1(16) | C(43)-C(44)-C(45)   | 117.4(12) |
| C(32)-C(33)-C(28) | 125.6(15) | C(43)-C(44)-H(44)   | 121.3     |
| C(32)-C(33)-F(10) | 116.7(13) | C(45)-C(44)-H(44)   | 121.3     |
| C(28)-C(33)-F(10) | 117.7(11) | C(46)-C(45)-C(44)   | 118.6(13) |
| N(3)-C(34)-Au(2)  | 177.3(9)  | C(46)-C(45)-H(45)   | 120.7     |
| C(40)-C(35)-N(3)  | 121.4(9)  | C(44)-C(45)-H(45)   | 120.7     |
| C(40)-C(35)-C(36) | 120.2(9)  | C(47)-C(46)-C(45)   | 122.6(11) |
| N(3)-C(35)-C(36)  | 118.4(9)  | C(47)-C(46)-H(46)   | 118.7     |
| C(37)-C(36)-C(35) | 118.9(9)  | C(45)-C(46)-H(46)   | 118.7     |
| C(37)-C(36)-H(36) | 120.5     | C(46)-C(47)-C(48)   | 119.4(12) |
| C(35)-C(36)-H(36) | 120.5     | C(46)-C(47)-H(47)   | 120.3     |
| C(38)-C(37)-C(36) | 121.6(9)  | C(48)-C(47)-H(47)   | 120.3     |
| C(38)-C(37)-H(37) | 119.2     | C(47)-C(48)-C(43)   | 119.0(12) |
| C(36)-C(37)-H(37) | 119.2     | C(47)-C(48)-C(49)   | 134.8(11) |
| O(2)-C(38)-C(37)  | 116.1(8)  | C(43)-C(48)-C(49)   | 106.2(9)  |
| O(2)-C(38)-C(39)  | 124.9(8)  | C(54)-C(49)-C(50)   | 119.6(13) |
| C(37)-C(38)-C(39) | 119.0(9)  | C(54)-C(49)-C(48)   | 107.0(9)  |

|                     |           |                      |           |
|---------------------|-----------|----------------------|-----------|
| C(50)-C(49)-C(48)   | 133.3(13) | Cl(1)#1-C(55)-H(55A) | 112.6     |
| C(49)-C(50)-C(51)   | 117.3(16) | Cl(1)-C(55)-H(55A)   | 112.6     |
| C(49)-C(50)-H(50)   | 121.4     | Cl(1)#1-C(55)-H(55B) | 112.6     |
| C(51)-C(50)-H(50)   | 121.4     | Cl(1)-C(55)-H(55B)   | 112.6     |
| C(52)-C(51)-C(50)   | 121.3(15) | H(55A)-C(55)-H(55B)  | 110.1     |
| C(52)-C(51)-H(51)   | 119.3     | C(55)#1-Cl(1)-C(55)  | 84.3(10)  |
| C(50)-C(51)-H(51)   | 119.3     | C(7)-N(1)-C(8)       | 170.9(13) |
| C(51)-C(52)-C(53)   | 121.1(15) | C(16)-N(2)-C(27)     | 109.6(8)  |
| C(51)-C(52)-H(52)   | 119.4     | C(16)-N(2)-C(15)     | 123.9(8)  |
| C(53)-C(52)-H(52)   | 119.4     | C(27)-N(2)-C(15)     | 126.5(8)  |
| C(54)-C(53)-C(52)   | 116.9(13) | C(34)-N(3)-C(35)     | 175.3(10) |
| C(54)-C(53)-H(53)   | 121.6     | C(43)-N(4)-C(54)     | 106.8(7)  |
| C(52)-C(53)-H(53)   | 121.6     | C(43)-N(4)-C(42)     | 125.5(9)  |
| C(49)-C(54)-C(53)   | 123.7(10) | C(54)-N(4)-C(42)     | 127.8(8)  |
| C(49)-C(54)-N(4)    | 109.7(9)  | C(11)-O(1)-C(14)     | 117.8(7)  |
| C(53)-C(54)-N(4)    | 126.6(9)  | C(38)-O(2)-C(41)     | 119.8(7)  |
| Cl(1)#1-C(55)-Cl(1) | 95.7(10)  |                      |           |

**Table S7.** Bond lengths [ $\text{\AA}$ ] and angles [ $^\circ$ ] of **3**.

|            |          |              |          |
|------------|----------|--------------|----------|
| Au(1)-C(7) | 1.961(6) | C(9)-H(9)    | 0.9300   |
| Au(1)-C(1) | 2.028(5) | C(10)-C(11)  | 1.393(6) |
| C(1)-C(2)  | 1.385(7) | C(10)-H(10)  | 0.9300   |
| C(1)-C(6)  | 1.400(7) | C(11)-O(1)   | 1.348(5) |
| C(2)-C(3)  | 1.340(7) | C(11)-C(12)  | 1.398(6) |
| C(2)-F(1)  | 1.354(5) | C(12)-C(13)  | 1.379(6) |
| C(3)-F(2)  | 1.351(6) | C(12)-H(12)  | 0.9300   |
| C(3)-C(4)  | 1.367(7) | C(13)-H(13)  | 0.9300   |
| C(4)-F(3)  | 1.348(6) | C(14)-O(1)   | 1.444(6) |
| C(4)-C(5)  | 1.377(8) | C(14)-C(15)  | 1.492(7) |
| C(5)-F(4)  | 1.344(6) | C(14)-H(14A) | 0.9700   |
| C(5)-C(6)  | 1.359(8) | C(14)-H(14B) | 0.9700   |
| C(6)-F(5)  | 1.355(6) | C(15)-C(16)  | 1.528(7) |
| C(7)-N(1)  | 1.151(7) | C(15)-H(15A) | 0.9700   |
| C(8)-C(13) | 1.375(7) | C(15)-H(15B) | 0.9700   |
| C(8)-C(9)  | 1.375(7) | C(16)-C(17)  | 1.512(7) |
| C(8)-N(1)  | 1.408(6) | C(16)-H(16A) | 0.9700   |
| C(9)-C(10) | 1.371(7) | C(16)-H(16B) | 0.9700   |

|                 |            |                     |          |
|-----------------|------------|---------------------|----------|
| C(17)-N(2)      | 1.461(5)   | C(3)-C(4)-C(5)      | 118.8(5) |
| C(17)-H(17A)    | 0.9700     | F(4)-C(5)-C(6)      | 121.2(5) |
| C(17)-H(17B)    | 0.9700     | F(4)-C(5)-C(4)      | 119.3(5) |
| C(18)-N(2)      | 1.386(6)   | C(6)-C(5)-C(4)      | 119.4(5) |
| C(18)-C(26)     | 1.397(7)   | F(5)-C(6)-C(5)      | 117.2(4) |
| C(18)-C(19)     | 1.403(6)   | F(5)-C(6)-C(1)      | 119.1(5) |
| C(19)-C(29)     | 1.397(6)   | C(5)-C(6)-C(1)      | 123.7(5) |
| C(19)-C(20)     | 1.441(6)   | N(1)-C(7)-Au(1)     | 178.5(5) |
| C(20)-C(25)     | 1.381(6)   | C(13)-C(8)-C(9)     | 121.0(4) |
| C(20)-C(21)     | 1.403(7)   | C(13)-C(8)-N(1)     | 120.2(4) |
| C(21)-N(2)      | 1.388(6)   | C(9)-C(8)-N(1)      | 118.7(4) |
| C(21)-C(22)     | 1.389(6)   | C(10)-C(9)-C(8)     | 120.3(4) |
| C(22)-C(23)     | 1.392(8)   | C(10)-C(9)-H(9)     | 119.9    |
| C(22)-H(22)     | 0.9300     | C(8)-C(9)-H(9)      | 119.9    |
| C(23)-C(24)     | 1.375(11)  | C(9)-C(10)-C(11)    | 119.8(4) |
| C(23)-H(23)     | 0.9300     | C(9)-C(10)-H(10)    | 120.1    |
| C(24)-C(25)     | 1.370(8)   | C(11)-C(10)-H(10)   | 120.1    |
| C(24)-H(24)     | 0.9300     | O(1)-C(11)-C(10)    | 124.7(4) |
| C(25)-H(25)     | 0.9300     | O(1)-C(11)-C(12)    | 116.1(4) |
| C(26)-C(27)     | 1.385(8)   | C(10)-C(11)-C(12)   | 119.3(4) |
| C(26)-H(26)     | 0.9300     | C(13)-C(12)-C(11)   | 120.3(4) |
| C(27)-C(28)     | 1.386(9)   | C(13)-C(12)-H(12)   | 119.9    |
| C(27)-H(27)     | 0.9300     | C(11)-C(12)-H(12)   | 119.9    |
| C(28)-C(29)     | 1.360(8)   | C(8)-C(13)-C(12)    | 119.3(4) |
| C(28)-H(28)     | 0.9300     | C(8)-C(13)-H(13)    | 120.4    |
| C(29)-H(29)     | 0.9300     | C(12)-C(13)-H(13)   | 120.4    |
| C(7)-Au(1)-C(1) | 177.38(19) | O(1)-C(14)-C(15)    | 108.6(4) |
| C(2)-C(1)-C(6)  | 113.4(4)   | O(1)-C(14)-H(14A)   | 110.0    |
| C(2)-C(1)-Au(1) | 123.4(3)   | C(15)-C(14)-H(14A)  | 110.0    |
| C(6)-C(1)-Au(1) | 123.2(4)   | O(1)-C(14)-H(14B)   | 110.0    |
| C(3)-C(2)-F(1)  | 117.7(5)   | C(15)-C(14)-H(14B)  | 110.0    |
| C(3)-C(2)-C(1)  | 124.4(4)   | H(14A)-C(14)-H(14B) | 108.3    |
| F(1)-C(2)-C(1)  | 117.9(5)   | C(14)-C(15)-C(16)   | 115.4(4) |
| C(2)-C(3)-F(2)  | 121.6(5)   | C(14)-C(15)-H(15A)  | 108.4    |
| C(2)-C(3)-C(4)  | 120.3(5)   | C(16)-C(15)-H(15A)  | 108.4    |
| F(2)-C(3)-C(4)  | 118.2(5)   | C(14)-C(15)-H(15B)  | 108.4    |
| F(3)-C(4)-C(3)  | 121.1(5)   | C(16)-C(15)-H(15B)  | 108.4    |
| F(3)-C(4)-C(5)  | 120.1(5)   | H(15A)-C(15)-H(15B) | 107.5    |

|                     |          |                   |          |
|---------------------|----------|-------------------|----------|
| C(17)-C(16)-C(15)   | 115.0(4) | C(24)-C(23)-C(22) | 121.7(5) |
| C(17)-C(16)-H(16A)  | 108.5    | C(24)-C(23)-H(23) | 119.2    |
| C(15)-C(16)-H(16A)  | 108.5    | C(22)-C(23)-H(23) | 119.2    |
| C(17)-C(16)-H(16B)  | 108.5    | C(25)-C(24)-C(23) | 120.6(5) |
| C(15)-C(16)-H(16B)  | 108.5    | C(25)-C(24)-H(24) | 119.7    |
| H(16A)-C(16)-H(16B) | 107.5    | C(23)-C(24)-H(24) | 119.7    |
| N(2)-C(17)-C(16)    | 111.8(4) | C(24)-C(25)-C(20) | 119.7(5) |
| N(2)-C(17)-H(17A)   | 109.3    | C(24)-C(25)-H(25) | 120.2    |
| C(16)-C(17)-H(17A)  | 109.3    | C(20)-C(25)-H(25) | 120.2    |
| N(2)-C(17)-H(17B)   | 109.3    | C(27)-C(26)-C(18) | 117.1(5) |
| C(16)-C(17)-H(17B)  | 109.3    | C(27)-C(26)-H(26) | 121.4    |
| H(17A)-C(17)-H(17B) | 107.9    | C(18)-C(26)-H(26) | 121.4    |
| N(2)-C(18)-C(26)    | 129.2(4) | C(26)-C(27)-C(28) | 120.9(6) |
| N(2)-C(18)-C(19)    | 108.7(4) | C(26)-C(27)-H(27) | 119.6    |
| C(26)-C(18)-C(19)   | 122.1(4) | C(28)-C(27)-H(27) | 119.6    |
| C(29)-C(19)-C(18)   | 118.8(5) | C(29)-C(28)-C(27) | 122.0(5) |
| C(29)-C(19)-C(20)   | 133.9(5) | C(29)-C(28)-H(28) | 119.0    |
| C(18)-C(19)-C(20)   | 107.2(4) | C(27)-C(28)-H(28) | 119.0    |
| C(25)-C(20)-C(21)   | 119.4(4) | C(28)-C(29)-C(19) | 119.1(5) |
| C(25)-C(20)-C(19)   | 134.2(5) | C(28)-C(29)-H(29) | 120.5    |
| C(21)-C(20)-C(19)   | 106.4(4) | C(19)-C(29)-H(29) | 120.5    |
| N(2)-C(21)-C(22)    | 129.5(4) | C(7)-N(1)-C(8)    | 177.7(5) |
| N(2)-C(21)-C(20)    | 109.2(4) | C(18)-N(2)-C(21)  | 108.5(4) |
| C(22)-C(21)-C(20)   | 121.3(4) | C(18)-N(2)-C(17)  | 125.8(4) |
| C(21)-C(22)-C(23)   | 117.2(5) | C(21)-N(2)-C(17)  | 125.0(4) |
| C(21)-C(22)-H(22)   | 121.4    | C(11)-O(1)-C(14)  | 117.2(4) |
| C(23)-C(22)-H(22)   | 121.4    |                   |          |

**Table S8.** Bond lengths [ $\text{\AA}$ ] and angles [ $^\circ$ ] of **4**.

|               |            |            |           |
|---------------|------------|------------|-----------|
| Au(1)-C(7)    | 1.967(12)  | C(4)-F(3)  | 1.355(14) |
| Au(1)-C(1)    | 2.004(11)  | C(4)-C(5)  | 1.378(18) |
| Au(1)-Au(1)#1 | 3.1262(11) | C(5)-C(6)  | 1.355(17) |
| C(1)-C(6)     | 1.390(16)  | C(5)-F(4)  | 1.358(14) |
| C(1)-C(2)     | 1.412(17)  | C(6)-F(5)  | 1.351(13) |
| C(2)-F(1)     | 1.373(13)  | C(7)-N(3)  | 1.145(15) |
| C(2)-C(3)     | 1.378(18)  | C(8)-C(9)  | 1.346(18) |
| C(3)-F(2)     | 1.320(15)  | C(8)-C(13) | 1.366(17) |
| C(3)-C(4)     | 1.357(19)  | C(8)-N(3)  | 1.413(15) |

|              |           |                    |           |
|--------------|-----------|--------------------|-----------|
| C(9)-C(10)   | 1.390(17) | C(25)-C(30)        | 1.414(15) |
| C(9)-H(9)    | 0.9300    | C(26)-C(27)        | 1.352(19) |
| C(10)-C(11)  | 1.375(17) | C(26)-H(26)        | 0.9300    |
| C(10)-H(10)  | 0.9300    | C(27)-C(28)        | 1.39(2)   |
| C(11)-O(1)   | 1.357(14) | C(27)-H(27)        | 0.9300    |
| C(11)-C(12)  | 1.386(17) | C(28)-C(29)        | 1.367(19) |
| C(12)-C(13)  | 1.396(17) | C(28)-H(28)        | 0.9300    |
| C(12)-H(12)  | 0.9300    | C(29)-C(30)        | 1.355(18) |
| C(13)-H(13)  | 0.9300    | C(29)-H(29)        | 0.9300    |
| C(14)-O(1)   | 1.458(15) | C(30)-N(1)         | 1.413(15) |
| C(14)-C(15)  | 1.500(17) | C(7)-Au(1)-C(1)    | 175.4(5)  |
| C(14)-H(14A) | 0.9700    | C(7)-Au(1)-Au(1)#1 | 76.7(4)   |
| C(14)-H(14B) | 0.9700    | C(1)-Au(1)-Au(1)#1 | 99.5(3)   |
| C(15)-C(16)  | 1.531(17) | C(6)-C(1)-C(2)     | 111.7(10) |
| C(15)-H(15A) | 0.9700    | C(6)-C(1)-Au(1)    | 125.3(10) |
| C(15)-H(15B) | 0.9700    | C(2)-C(1)-Au(1)    | 122.8(8)  |
| C(16)-C(17)  | 1.534(18) | F(1)-C(2)-C(3)     | 116.8(11) |
| C(16)-H(16A) | 0.9700    | F(1)-C(2)-C(1)     | 118.1(10) |
| C(16)-H(16B) | 0.9700    | C(3)-C(2)-C(1)     | 125.1(11) |
| C(17)-C(18)  | 1.491(18) | F(2)-C(3)-C(4)     | 120.9(12) |
| C(17)-H(17A) | 0.9700    | F(2)-C(3)-C(2)     | 121.4(12) |
| C(17)-H(17B) | 0.9700    | C(4)-C(3)-C(2)     | 117.8(12) |
| C(18)-N(1)   | 1.469(14) | F(3)-C(4)-C(3)     | 119.9(12) |
| C(18)-H(18A) | 0.9700    | F(3)-C(4)-C(5)     | 118.7(12) |
| C(18)-H(18B) | 0.9700    | C(3)-C(4)-C(5)     | 121.4(11) |
| C(19)-N(1)   | 1.369(15) | C(6)-C(5)-F(4)     | 120.9(12) |
| C(19)-C(20)  | 1.389(17) | C(6)-C(5)-C(4)     | 118.1(11) |
| C(19)-C(24)  | 1.400(16) | F(4)-C(5)-C(4)     | 120.9(11) |
| C(20)-C(21)  | 1.38(2)   | F(5)-C(6)-C(5)     | 117.0(11) |
| C(20)-H(20)  | 0.9300    | F(5)-C(6)-C(1)     | 117.0(11) |
| C(21)-C(22)  | 1.42(2)   | C(5)-C(6)-C(1)     | 125.9(12) |
| C(21)-H(21)  | 0.9300    | N(3)-C(7)-Au(1)    | 174.0(12) |
| C(22)-C(23)  | 1.355(18) | C(9)-C(8)-C(13)    | 121.6(11) |
| C(22)-H(22)  | 0.9300    | C(9)-C(8)-N(3)     | 121.6(12) |
| C(23)-C(24)  | 1.404(17) | C(13)-C(8)-N(3)    | 116.7(11) |
| C(23)-H(23)  | 0.9300    | C(8)-C(9)-C(10)    | 121.0(12) |
| C(24)-C(25)  | 1.428(16) | C(8)-C(9)-H(9)     | 119.5     |
| C(25)-C(26)  | 1.406(16) | C(10)-C(9)-H(9)    | 119.5     |

|                     |           |                     |           |
|---------------------|-----------|---------------------|-----------|
| C(11)-C(10)-C(9)    | 118.2(11) | C(17)-C(18)-H(18A)  | 109.1     |
| C(11)-C(10)-H(10)   | 120.9     | N(1)-C(18)-H(18B)   | 109.1     |
| C(9)-C(10)-H(10)    | 120.9     | C(17)-C(18)-H(18B)  | 109.1     |
| O(1)-C(11)-C(10)    | 125.0(11) | H(18A)-C(18)-H(18B) | 107.8     |
| O(1)-C(11)-C(12)    | 114.1(10) | N(1)-C(19)-C(20)    | 129.7(11) |
| C(10)-C(11)-C(12)   | 120.8(11) | N(1)-C(19)-C(24)    | 108.1(10) |
| C(11)-C(12)-C(13)   | 119.6(11) | C(20)-C(19)-C(24)   | 122.1(11) |
| C(11)-C(12)-H(12)   | 120.2     | C(21)-C(20)-C(19)   | 117.1(13) |
| C(13)-C(12)-H(12)   | 120.2     | C(21)-C(20)-H(20)   | 121.5     |
| C(8)-C(13)-C(12)    | 118.6(11) | C(19)-C(20)-H(20)   | 121.5     |
| C(8)-C(13)-H(13)    | 120.7     | C(20)-C(21)-C(22)   | 122.0(13) |
| C(12)-C(13)-H(13)   | 120.7     | C(20)-C(21)-H(21)   | 119.0     |
| O(1)-C(14)-C(15)    | 105.0(10) | C(22)-C(21)-H(21)   | 119.0     |
| O(1)-C(14)-H(14A)   | 110.7     | C(23)-C(22)-C(21)   | 119.1(14) |
| C(15)-C(14)-H(14A)  | 110.7     | C(23)-C(22)-H(22)   | 120.4     |
| O(1)-C(14)-H(14B)   | 110.7     | C(21)-C(22)-H(22)   | 120.4     |
| C(15)-C(14)-H(14B)  | 110.7     | C(22)-C(23)-C(24)   | 120.7(13) |
| H(14A)-C(14)-H(14B) | 108.8     | C(22)-C(23)-H(23)   | 119.6     |
| C(14)-C(15)-C(16)   | 110.6(11) | C(24)-C(23)-H(23)   | 119.6     |
| C(14)-C(15)-H(15A)  | 109.5     | C(19)-C(24)-C(23)   | 118.6(11) |
| C(16)-C(15)-H(15A)  | 109.5     | C(19)-C(24)-C(25)   | 108.0(10) |
| C(14)-C(15)-H(15B)  | 109.5     | C(23)-C(24)-C(25)   | 133.3(11) |
| C(16)-C(15)-H(15B)  | 109.5     | C(26)-C(25)-C(30)   | 117.5(11) |
| H(15A)-C(15)-H(15B) | 108.1     | C(26)-C(25)-C(24)   | 135.3(11) |
| C(15)-C(16)-C(17)   | 112.8(11) | C(30)-C(25)-C(24)   | 107.2(10) |
| C(15)-C(16)-H(16A)  | 109.0     | C(27)-C(26)-C(25)   | 120.0(12) |
| C(17)-C(16)-H(16A)  | 109.0     | C(27)-C(26)-H(26)   | 120.0     |
| C(15)-C(16)-H(16B)  | 109.0     | C(25)-C(26)-H(26)   | 120.0     |
| C(17)-C(16)-H(16B)  | 109.0     | C(26)-C(27)-C(28)   | 120.1(12) |
| H(16A)-C(16)-H(16B) | 107.8     | C(26)-C(27)-H(27)   | 119.9     |
| C(18)-C(17)-C(16)   | 113.3(11) | C(28)-C(27)-H(27)   | 119.9     |
| C(18)-C(17)-H(17A)  | 108.9     | C(29)-C(28)-C(27)   | 122.1(14) |
| C(16)-C(17)-H(17A)  | 108.9     | C(29)-C(28)-H(28)   | 119.0     |
| C(18)-C(17)-H(17B)  | 108.9     | C(27)-C(28)-H(28)   | 119.0     |
| C(16)-C(17)-H(17B)  | 108.9     | C(30)-C(29)-C(28)   | 117.7(13) |
| H(17A)-C(17)-H(17B) | 107.7     | C(30)-C(29)-H(29)   | 121.2     |
| N(1)-C(18)-C(17)    | 112.6(10) | C(28)-C(29)-H(29)   | 121.2     |
| N(1)-C(18)-H(18A)   | 109.1     | C(29)-C(30)-N(1)    | 130.7(11) |

|                   |           |                  |           |
|-------------------|-----------|------------------|-----------|
| C(29)-C(30)-C(25) | 122.6(11) | C(30)-N(1)-C(18) | 123.2(10) |
| N(1)-C(30)-C(25)  | 106.7(10) | C(7)-N(3)-C(8)   | 176.4(14) |
| C(19)-N(1)-C(30)  | 110.0(9)  | C(11)-O(1)-C(14) | 118.1(9)  |
| C(19)-N(1)-C(18)  | 126.8(10) |                  |           |

**Table S9.** Bond lengths [ $\text{\AA}$ ] and angles [ $^\circ$ ] of **5**.

|              |           |              |           |
|--------------|-----------|--------------|-----------|
| Au(1)-C(25)  | 1.962(7)  | C(12)-N(2)   | 1.463(6)  |
| Au(1)-C(26)  | 2.017(6)  | C(12)-H(12A) | 0.9700    |
| C(1)-C(2)    | 1.365(10) | C(12)-H(12B) | 0.9700    |
| C(1)-C(6)    | 1.397(9)  | C(13)-C(14)  | 1.369(8)  |
| C(1)-N(1)    | 1.408(8)  | C(13)-N(2)   | 1.387(7)  |
| C(2)-C(3)    | 1.364(9)  | C(13)-C(18)  | 1.424(7)  |
| C(2)-H(2)    | 0.9300    | C(14)-C(15)  | 1.374(9)  |
| C(3)-C(4)    | 1.403(8)  | C(14)-H(14)  | 0.9300    |
| C(3)-H(3)    | 0.9300    | C(15)-C(16)  | 1.401(10) |
| C(4)-O(1)    | 1.361(7)  | C(15)-H(15)  | 0.9300    |
| C(4)-C(5)    | 1.371(9)  | C(16)-C(17)  | 1.358(9)  |
| C(5)-C(6)    | 1.389(8)  | C(16)-H(16)  | 0.9300    |
| C(5)-H(5)    | 0.9300    | C(17)-C(18)  | 1.400(8)  |
| C(6)-H(6)    | 0.9300    | C(17)-H(17)  | 0.9300    |
| C(7)-O(1)    | 1.427(7)  | C(18)-C(19)  | 1.445(8)  |
| C(7)-C(8)    | 1.498(8)  | C(19)-C(20)  | 1.390(8)  |
| C(7)-H(7A)   | 0.9700    | C(19)-C(24)  | 1.402(7)  |
| C(7)-H(7B)   | 0.9700    | C(20)-C(21)  | 1.372(9)  |
| C(8)-C(9)    | 1.507(8)  | C(20)-H(20)  | 0.9300    |
| C(8)-H(8A)   | 0.9700    | C(21)-C(22)  | 1.371(10) |
| C(8)-H(8B)   | 0.9700    | C(21)-H(21)  | 0.9300    |
| C(9)-C(10)   | 1.506(7)  | C(22)-C(23)  | 1.361(9)  |
| C(9)-H(9A)   | 0.9700    | C(22)-H(22)  | 0.9300    |
| C(9)-H(9B)   | 0.9700    | C(23)-C(24)  | 1.380(8)  |
| C(10)-C(11)  | 1.528(6)  | C(23)-H(23)  | 0.9300    |
| C(10)-H(10A) | 0.9700    | C(24)-N(2)   | 1.395(6)  |
| C(10)-H(10B) | 0.9700    | C(25)-N(1)   | 1.151(9)  |
| C(11)-C(12)  | 1.509(7)  | C(26)-C(31)  | 1.372(9)  |
| C(11)-H(11A) | 0.9700    | C(26)-C(27)  | 1.395(9)  |
| C(11)-H(11B) | 0.9700    | C(27)-F(1)   | 1.333(8)  |



|                   |           |                     |          |
|-------------------|-----------|---------------------|----------|
| C(27)-C(28)       | 1.355(9)  | H(8A)-C(8)-H(8B)    | 107.8    |
| C(28)-C(29)       | 1.321(12) | C(10)-C(9)-C(8)     | 114.4(5) |
| C(28)-F(2)        | 1.387(8)  | C(10)-C(9)-H(9A)    | 108.7    |
| C(29)-F(3)        | 1.367(7)  | C(8)-C(9)-H(9A)     | 108.7    |
| C(29)-C(30)       | 1.374(11) | C(10)-C(9)-H(9B)    | 108.7    |
| C(30)-F(4)        | 1.353(8)  | C(8)-C(9)-H(9B)     | 108.7    |
| C(30)-C(31)       | 1.356(9)  | H(9A)-C(9)-H(9B)    | 107.6    |
| C(31)-F(5)        | 1.354(7)  | C(9)-C(10)-C(11)    | 113.7(4) |
| C(25)-Au(1)-C(26) | 178.7(2)  | C(9)-C(10)-H(10A)   | 108.8    |
| C(2)-C(1)-C(6)    | 121.5(6)  | C(11)-C(10)-H(10A)  | 108.8    |
| C(2)-C(1)-N(1)    | 120.2(6)  | C(9)-C(10)-H(10B)   | 108.8    |
| C(6)-C(1)-N(1)    | 118.2(6)  | C(11)-C(10)-H(10B)  | 108.8    |
| C(3)-C(2)-C(1)    | 119.2(6)  | H(10A)-C(10)-H(10B) | 107.7    |
| C(3)-C(2)-H(2)    | 120.4     | C(12)-C(11)-C(10)   | 111.5(4) |
| C(1)-C(2)-H(2)    | 120.4     | C(12)-C(11)-H(11A)  | 109.3    |
| C(2)-C(3)-C(4)    | 120.5(6)  | C(10)-C(11)-H(11A)  | 109.3    |
| C(2)-C(3)-H(3)    | 119.7     | C(12)-C(11)-H(11B)  | 109.3    |
| C(4)-C(3)-H(3)    | 119.7     | C(10)-C(11)-H(11B)  | 109.3    |
| O(1)-C(4)-C(5)    | 124.8(5)  | H(11A)-C(11)-H(11B) | 108.0    |
| O(1)-C(4)-C(3)    | 114.9(5)  | N(2)-C(12)-C(11)    | 114.4(4) |
| C(5)-C(4)-C(3)    | 120.3(6)  | N(2)-C(12)-H(12A)   | 108.7    |
| C(4)-C(5)-C(6)    | 119.3(6)  | C(11)-C(12)-H(12A)  | 108.7    |
| C(4)-C(5)-H(5)    | 120.3     | N(2)-C(12)-H(12B)   | 108.7    |
| C(6)-C(5)-H(5)    | 120.3     | C(11)-C(12)-H(12B)  | 108.7    |
| C(5)-C(6)-C(1)    | 119.1(6)  | H(12A)-C(12)-H(12B) | 107.6    |
| C(5)-C(6)-H(6)    | 120.4     | C(14)-C(13)-N(2)    | 129.5(5) |
| C(1)-C(6)-H(6)    | 120.4     | C(14)-C(13)-C(18)   | 122.8(5) |
| O(1)-C(7)-C(8)    | 109.1(5)  | N(2)-C(13)-C(18)    | 107.6(4) |
| O(1)-C(7)-H(7A)   | 109.9     | C(13)-C(14)-C(15)   | 117.5(5) |
| C(8)-C(7)-H(7A)   | 109.9     | C(13)-C(14)-H(14)   | 121.3    |
| O(1)-C(7)-H(7B)   | 109.9     | C(15)-C(14)-H(14)   | 121.3    |
| C(8)-C(7)-H(7B)   | 109.9     | C(14)-C(15)-C(16)   | 121.0(6) |
| H(7A)-C(7)-H(7B)  | 108.3     | C(14)-C(15)-H(15)   | 119.5    |
| C(7)-C(8)-C(9)    | 113.1(5)  | C(16)-C(15)-H(15)   | 119.5    |
| C(7)-C(8)-H(8A)   | 109.0     | C(17)-C(16)-C(15)   | 121.7(6) |
| C(9)-C(8)-H(8A)   | 109.0     | C(17)-C(16)-H(16)   | 119.1    |
| C(7)-C(8)-H(8B)   | 109.0     | C(15)-C(16)-H(16)   | 119.1    |
| C(9)-C(8)-H(8B)   | 109.0     | C(16)-C(17)-C(18)   | 119.1(5) |

|                   |          |                   |          |
|-------------------|----------|-------------------|----------|
| C(16)-C(17)-H(17) | 120.5    | C(31)-C(26)-C(27) | 112.9(6) |
| C(18)-C(17)-H(17) | 120.5    | C(31)-C(26)-Au(1) | 122.9(5) |
| C(17)-C(18)-C(13) | 117.8(5) | C(27)-C(26)-Au(1) | 124.2(5) |
| C(17)-C(18)-C(19) | 134.7(5) | F(1)-C(27)-C(28)  | 117.3(6) |
| C(13)-C(18)-C(19) | 107.4(4) | F(1)-C(27)-C(26)  | 120.1(6) |
| C(20)-C(19)-C(24) | 118.2(5) | C(28)-C(27)-C(26) | 122.7(6) |
| C(20)-C(19)-C(18) | 135.2(5) | C(29)-C(28)-C(27) | 121.7(6) |
| C(24)-C(19)-C(18) | 106.6(4) | C(29)-C(28)-F(2)  | 118.5(6) |
| C(21)-C(20)-C(19) | 119.5(6) | C(27)-C(28)-F(2)  | 119.7(7) |
| C(21)-C(20)-H(20) | 120.3    | C(28)-C(29)-F(3)  | 121.5(7) |
| C(19)-C(20)-H(20) | 120.3    | C(28)-C(29)-C(30) | 119.1(6) |
| C(22)-C(21)-C(20) | 120.2(6) | F(3)-C(29)-C(30)  | 119.4(7) |
| C(22)-C(21)-H(21) | 119.9    | F(4)-C(30)-C(31)  | 120.5(7) |
| C(20)-C(21)-H(21) | 119.9    | F(4)-C(30)-C(29)  | 121.0(6) |
| C(23)-C(22)-C(21) | 122.7(6) | C(31)-C(30)-C(29) | 118.5(6) |
| C(23)-C(22)-H(22) | 118.6    | F(5)-C(31)-C(30)  | 116.5(6) |
| C(21)-C(22)-H(22) | 118.6    | F(5)-C(31)-C(26)  | 118.4(6) |
| C(22)-C(23)-C(24) | 117.0(5) | C(30)-C(31)-C(26) | 125.1(6) |
| C(22)-C(23)-H(23) | 121.5    | C(25)-N(1)-C(1)   | 179.4(8) |
| C(24)-C(23)-H(23) | 121.5    | C(13)-N(2)-C(24)  | 109.4(4) |
| C(23)-C(24)-N(2)  | 128.7(5) | C(13)-N(2)-C(12)  | 124.7(4) |
| C(23)-C(24)-C(19) | 122.3(5) | C(24)-N(2)-C(12)  | 125.8(4) |
| N(2)-C(24)-C(19)  | 109.0(4) | C(4)-O(1)-C(7)    | 117.8(5) |
| N(1)-C(25)-Au(1)  | 179.1(6) |                   |          |

**Table S10.** Bond lengths [ $\text{\AA}$ ] and angles [ $^{\circ}$ ] of **7**.

|               |            |             |           |
|---------------|------------|-------------|-----------|
| Au(1)-C(7)    | 1.984(15)  | N(2)-C(21)  | 1.437(15) |
| Au(1)-C(1)    | 2.048(12)  | C(24)-C(29) | 1.402(16) |
| Au(1)-Au(1)#1 | 3.3575(14) | C(24)-C(25) | 1.413(15) |
| O(1)-C(11)    | 1.348(14)  | C(24)-C(23) | 1.445(16) |
| O(1)-C(14)    | 1.428(13)  | N(1)-C(7)   | 1.132(17) |
| C(15)-C(14)   | 1.515(16)  | N(1)-C(8)   | 1.415(15) |
| C(15)-C(16)   | 1.519(17)  | C(12)-C(13) | 1.369(18) |
| C(15)-H(15A)  | 0.9700     | C(12)-C(11) | 1.382(18) |
| C(15)-H(15B)  | 0.9700     | C(12)-H(12) | 0.9300    |
| N(2)-C(29)    | 1.371(14)  | C(29)-C(28) | 1.393(17) |
| N(2)-C(22)    | 1.392(18)  | C(11)-C(10) | 1.397(18) |

|              |           |                     |           |
|--------------|-----------|---------------------|-----------|
| C(13)-C(8)   | 1.356(19) | C(30)-C(31)         | 1.38(3)   |
| C(13)-H(13)  | 0.9300    | C(30)-H(30)         | 0.9300    |
| C(21)-C(20)  | 1.524(17) | C(18)-H(18A)        | 0.9700    |
| C(21)-H(21A) | 0.9700    | C(18)-H(18B)        | 0.9700    |
| C(21)-H(21B) | 0.9700    | C(2)-F(1)           | 1.364(18) |
| C(23)-C(33)  | 1.391(18) | C(2)-C(3)           | 1.38(2)   |
| C(23)-C(22)  | 1.392(17) | C(3)-C(4)           | 1.33(2)   |
| C(14)-H(14A) | 0.9700    | C(10)-H(10)         | 0.9300    |
| C(14)-H(14B) | 0.9700    | C(4)-C(5)           | 1.388(19) |
| F(2)-C(3)    | 1.343(14) | C(31)-C(32)         | 1.39(3)   |
| C(22)-C(30)  | 1.396(17) | C(31)-H(31)         | 0.9300    |
| C(16)-C(17)  | 1.510(16) | C(5)-F(4)           | 1.313(17) |
| C(16)-H(16A) | 0.9700    | C(33)-C(32)         | 1.36(2)   |
| C(16)-H(16B) | 0.9700    | C(33)-H(33)         | 0.9300    |
| C(9)-C(10)   | 1.360(18) | C(32)-H(32)         | 0.9300    |
| C(9)-C(8)    | 1.36(2)   | C(7)-Au(1)-C(1)     | 176.0(6)  |
| C(9)-H(9)    | 0.9300    | C(7)-Au(1)-Au(1)#1  | 93.4(5)   |
| C(26)-C(25)  | 1.363(18) | C(1)-Au(1)-Au(1)#1  | 88.4(4)   |
| C(26)-C(27)  | 1.38(2)   | C(11)-O(1)-C(14)    | 118.0(9)  |
| C(26)-H(26)  | 0.9300    | C(14)-C(15)-C(16)   | 111.8(10) |
| C(25)-H(25)  | 0.9300    | C(14)-C(15)-H(15A)  | 109.2     |
| C(19)-C(20)  | 1.499(17) | C(16)-C(15)-H(15A)  | 109.2     |
| C(19)-C(18)  | 1.533(17) | C(14)-C(15)-H(15B)  | 109.2     |
| C(19)-H(19A) | 0.9700    | C(16)-C(15)-H(15B)  | 109.2     |
| C(19)-H(19B) | 0.9700    | H(15A)-C(15)-H(15B) | 107.9     |
| C(28)-C(27)  | 1.389(18) | C(29)-N(2)-C(22)    | 108.1(10) |
| C(28)-H(28)  | 0.9300    | C(29)-N(2)-C(21)    | 126.1(11) |
| F(3)-C(4)    | 1.358(14) | C(22)-N(2)-C(21)    | 125.8(11) |
| C(6)-C(1)    | 1.34(2)   | C(29)-C(24)-C(25)   | 119.4(11) |
| C(6)-F(5)    | 1.356(13) | C(29)-C(24)-C(23)   | 106.8(9)  |
| C(6)-C(5)    | 1.39(2)   | C(25)-C(24)-C(23)   | 133.8(11) |
| C(1)-C(2)    | 1.347(19) | C(7)-N(1)-C(8)      | 170.8(16) |
| C(27)-H(27)  | 0.9300    | C(13)-C(12)-C(11)   | 120.3(13) |
| C(17)-C(18)  | 1.530(17) | C(13)-C(12)-H(12)   | 119.9     |
| C(17)-H(17A) | 0.9700    | C(11)-C(12)-H(12)   | 119.9     |
| C(17)-H(17B) | 0.9700    | N(2)-C(29)-C(28)    | 128.7(11) |
| C(20)-H(20A) | 0.9700    | N(2)-C(29)-C(24)    | 109.4(10) |
| C(20)-H(20B) | 0.9700    | C(28)-C(29)-C(24)   | 121.9(10) |

|                     |           |                     |           |
|---------------------|-----------|---------------------|-----------|
| O(1)-C(11)-C(12)    | 126.0(11) | C(26)-C(25)-H(25)   | 120.9     |
| O(1)-C(11)-C(10)    | 114.8(11) | C(24)-C(25)-H(25)   | 120.9     |
| C(12)-C(11)-C(10)   | 119.2(11) | C(20)-C(19)-C(18)   | 111.7(10) |
| C(8)-C(13)-C(12)    | 119.7(13) | C(20)-C(19)-H(19A)  | 109.3     |
| C(8)-C(13)-H(13)    | 120.1     | C(18)-C(19)-H(19A)  | 109.3     |
| C(12)-C(13)-H(13)   | 120.1     | C(20)-C(19)-H(19B)  | 109.3     |
| N(1)-C(7)-Au(1)     | 170.5(15) | C(18)-C(19)-H(19B)  | 109.3     |
| N(2)-C(21)-C(20)    | 112.9(10) | H(19A)-C(19)-H(19B) | 107.9     |
| N(2)-C(21)-H(21A)   | 109.0     | C(27)-C(28)-C(29)   | 116.9(12) |
| C(20)-C(21)-H(21A)  | 109.0     | C(27)-C(28)-H(28)   | 121.6     |
| N(2)-C(21)-H(21B)   | 109.0     | C(29)-C(28)-H(28)   | 121.6     |
| C(20)-C(21)-H(21B)  | 109.0     | C(1)-C(6)-F(5)      | 118.0(12) |
| H(21A)-C(21)-H(21B) | 107.8     | C(1)-C(6)-C(5)      | 126.6(12) |
| C(33)-C(23)-C(22)   | 120.0(12) | F(5)-C(6)-C(5)      | 115.4(14) |
| C(33)-C(23)-C(24)   | 133.8(12) | C(6)-C(1)-C(2)      | 114.8(12) |
| C(22)-C(23)-C(24)   | 106.1(10) | C(6)-C(1)-Au(1)     | 122.0(9)  |
| O(1)-C(14)-C(15)    | 107.5(10) | C(2)-C(1)-Au(1)     | 123.2(11) |
| O(1)-C(14)-H(14A)   | 110.2     | C(26)-C(27)-C(28)   | 121.7(12) |
| C(15)-C(14)-H(14A)  | 110.2     | C(26)-C(27)-H(27)   | 119.2     |
| O(1)-C(14)-H(14B)   | 110.2     | C(28)-C(27)-H(27)   | 119.2     |
| C(15)-C(14)-H(14B)  | 110.2     | C(16)-C(17)-C(18)   | 113.1(11) |
| H(14A)-C(14)-H(14B) | 108.5     | C(16)-C(17)-H(17A)  | 109.0     |
| C(23)-C(22)-N(2)    | 109.6(10) | C(18)-C(17)-H(17A)  | 109.0     |
| C(23)-C(22)-C(30)   | 121.2(14) | C(16)-C(17)-H(17B)  | 109.0     |
| N(2)-C(22)-C(30)    | 129.1(14) | C(18)-C(17)-H(17B)  | 109.0     |
| C(17)-C(16)-C(15)   | 114.1(11) | H(17A)-C(17)-H(17B) | 107.8     |
| C(17)-C(16)-H(16A)  | 108.7     | C(19)-C(20)-C(21)   | 111.5(10) |
| C(15)-C(16)-H(16A)  | 108.7     | C(19)-C(20)-H(20A)  | 109.3     |
| C(17)-C(16)-H(16B)  | 108.7     | C(21)-C(20)-H(20A)  | 109.3     |
| C(15)-C(16)-H(16B)  | 108.7     | C(19)-C(20)-H(20B)  | 109.3     |
| H(16A)-C(16)-H(16B) | 107.6     | C(21)-C(20)-H(20B)  | 109.3     |
| C(10)-C(9)-C(8)     | 120.6(13) | H(20A)-C(20)-H(20B) | 108.0     |
| C(10)-C(9)-H(9)     | 119.7     | C(31)-C(30)-C(22)   | 117.1(16) |
| C(8)-C(9)-H(9)      | 119.7     | C(31)-C(30)-H(30)   | 121.4     |
| C(25)-C(26)-C(27)   | 121.9(11) | C(22)-C(30)-H(30)   | 121.4     |
| C(25)-C(26)-H(26)   | 119.0     | C(17)-C(18)-C(19)   | 115.4(11) |
| C(27)-C(26)-H(26)   | 119.0     | C(17)-C(18)-H(18A)  | 108.4     |
| C(26)-C(25)-C(24)   | 118.2(12) | C(19)-C(18)-H(18A)  | 108.4     |

|                     |           |                   |           |
|---------------------|-----------|-------------------|-----------|
| C(17)-C(18)-H(18B)  | 108.4     | C(3)-C(4)-F(3)    | 121.0(13) |
| C(19)-C(18)-H(18B)  | 108.4     | C(3)-C(4)-C(5)    | 121.7(13) |
| H(18A)-C(18)-H(18B) | 107.5     | F(3)-C(4)-C(5)    | 117.2(15) |
| C(1)-C(2)-F(1)      | 120.5(13) | C(30)-C(31)-C(32) | 121.8(13) |
| C(1)-C(2)-C(3)      | 123.2(14) | C(30)-C(31)-H(31) | 119.1     |
| F(1)-C(2)-C(3)      | 116.1(13) | C(32)-C(31)-H(31) | 119.1     |
| C(4)-C(3)-F(2)      | 119.1(13) | F(4)-C(5)-C(6)    | 123.1(13) |
| C(4)-C(3)-C(2)      | 119.2(12) | F(4)-C(5)-C(4)    | 122.4(14) |
| F(2)-C(3)-C(2)      | 121.6(15) | C(6)-C(5)-C(4)    | 114.4(14) |
| C(9)-C(10)-C(11)    | 119.2(13) | C(32)-C(33)-C(23) | 118.9(15) |
| C(9)-C(10)-H(10)    | 120.4     | C(32)-C(33)-H(33) | 120.6     |
| C(11)-C(10)-H(10)   | 120.4     | C(23)-C(33)-H(33) | 120.6     |
| C(13)-C(8)-C(9)     | 120.9(11) | C(33)-C(32)-C(31) | 120.9(15) |
| C(13)-C(8)-N(1)     | 121.6(13) | C(33)-C(32)-H(32) | 119.6     |
| C(9)-C(8)-N(1)      | 117.4(12) | C(31)-C(32)-H(32) | 119.6     |

## Copies of NMR spectra and Mass spectra

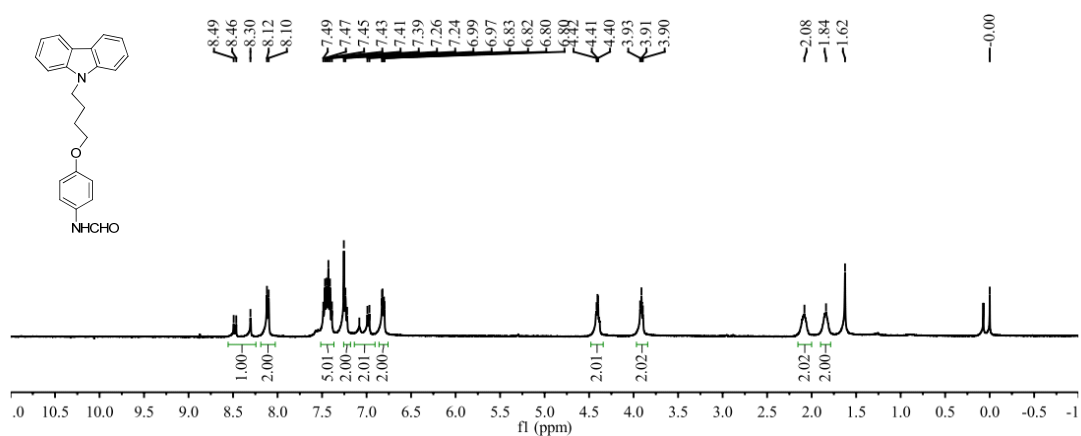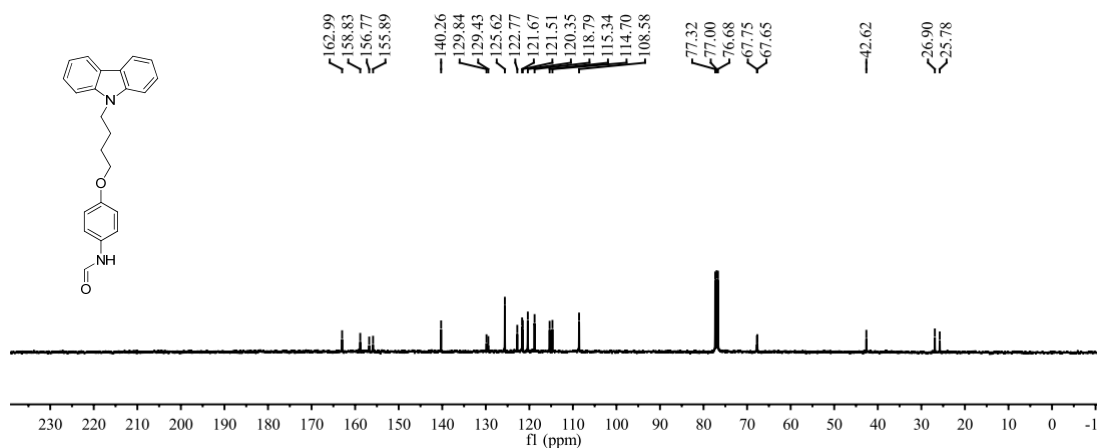

CZ308 #650 RT: 3.03 AV: 1 SB: 732 0.14-2.88, 3.31-3.93 NL: 0.45E4  
 T: + cFull.ms [40.00-500.00]

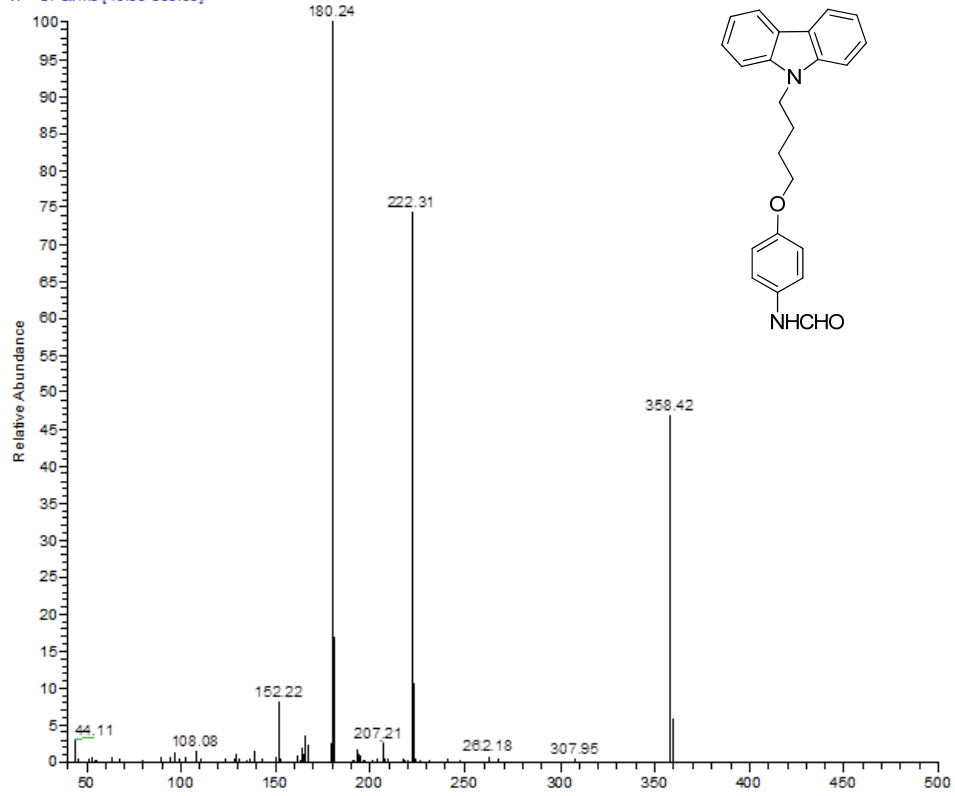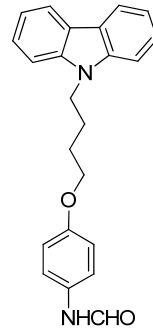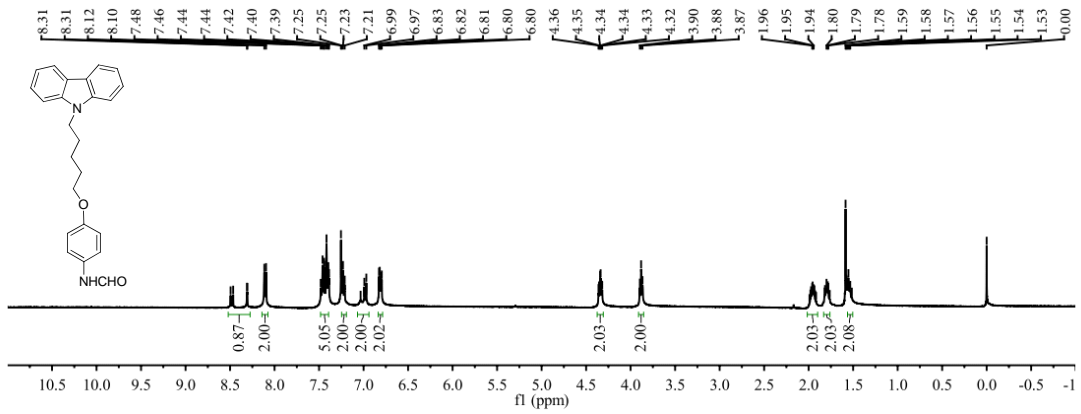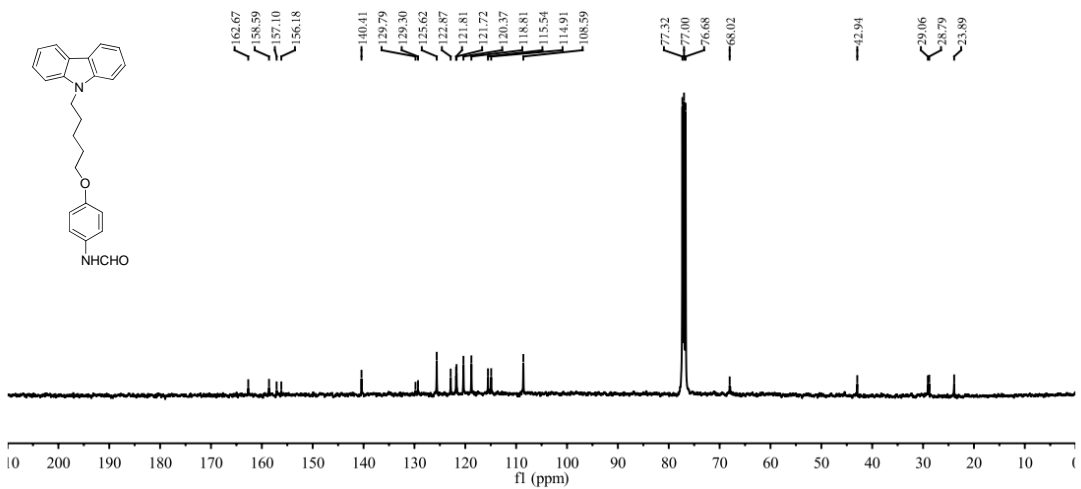



CZ235 #677 RT: 3.15 AV: 1 SB: 749 0.04-2.92, 3.44-4.00 NL: 3.45E5  
 T: +c Full ms [40.00-500.00]

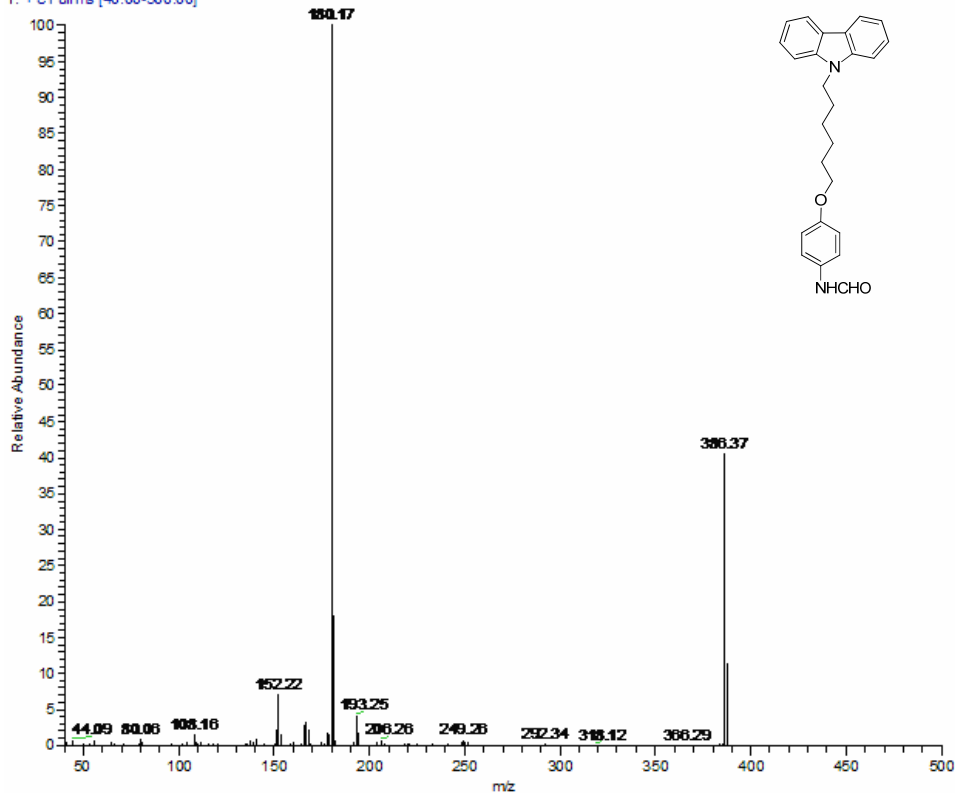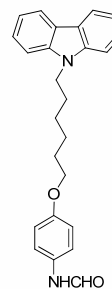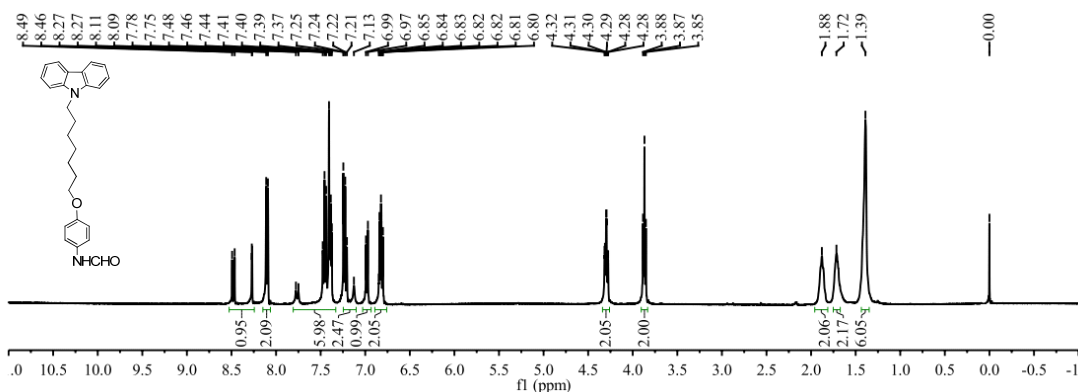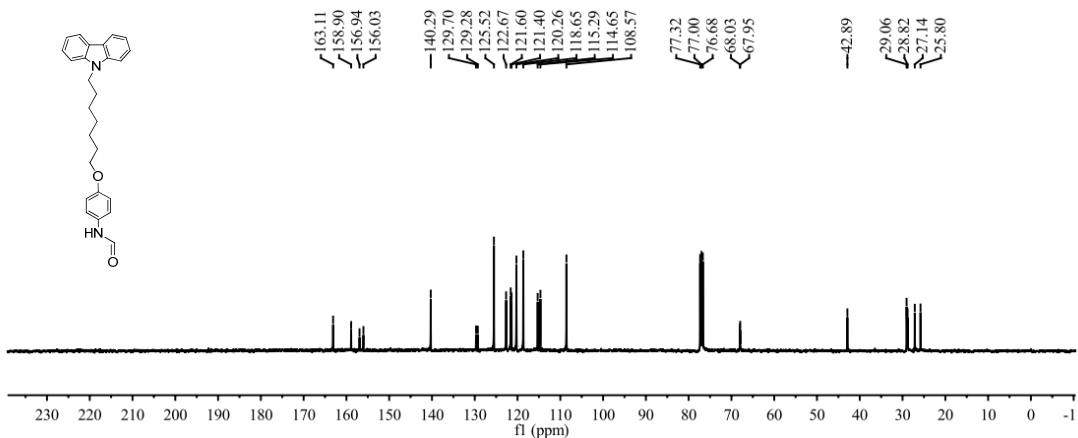



CZ373 #560 RT: 3.43 AV: 1 SB: 422 1.34-3.04, 3.80-4.33 NL: 4.07E6  
 T: +c Fullms [40.00-500.00]

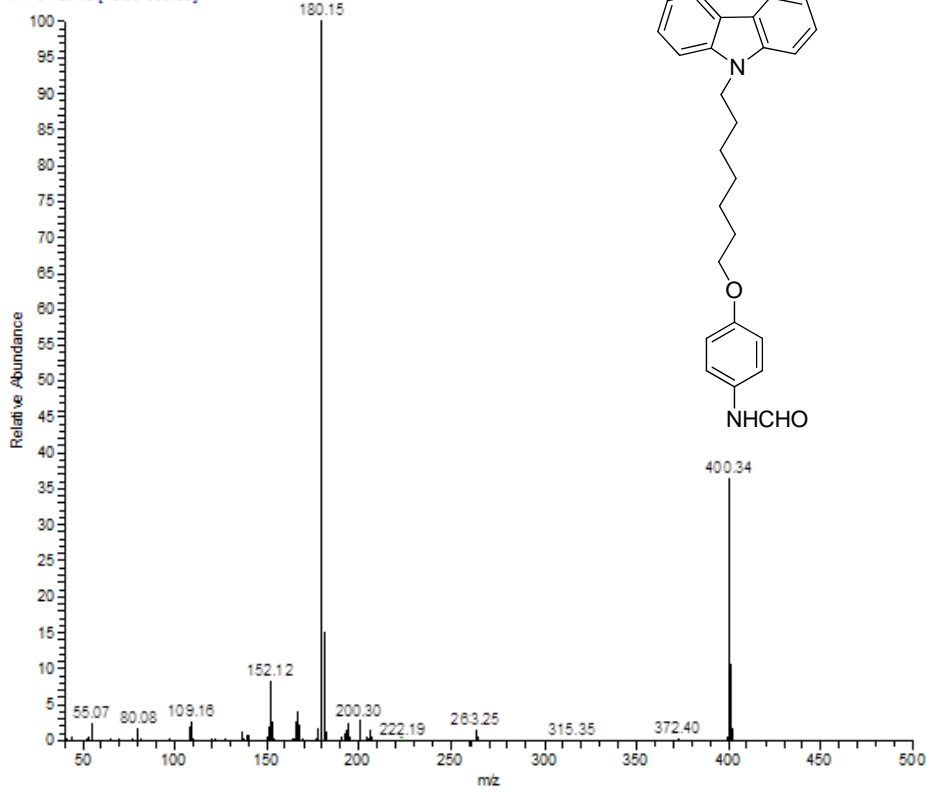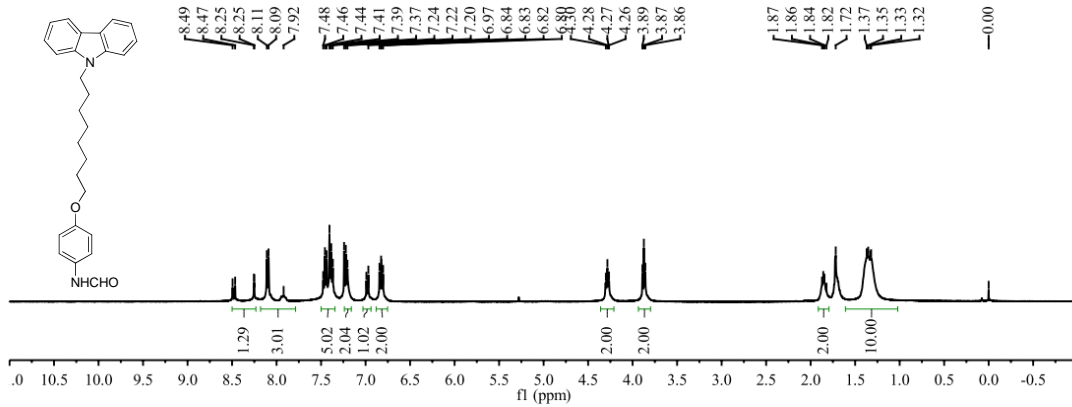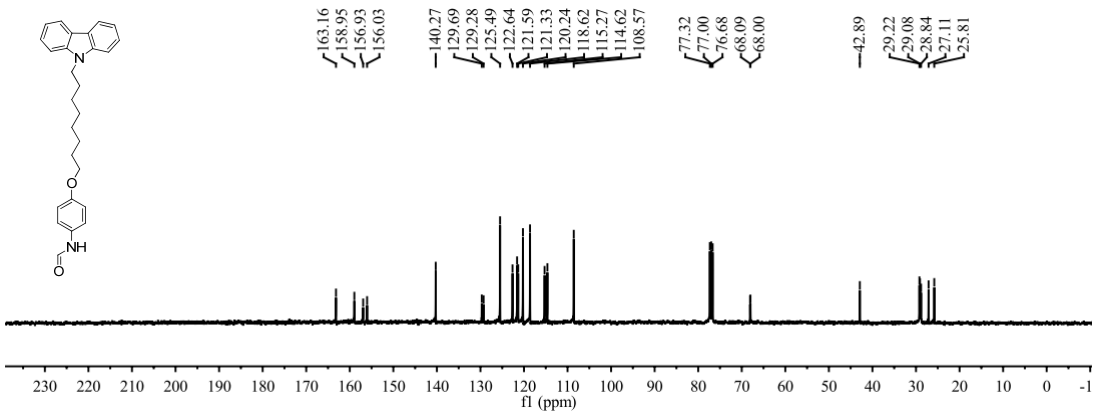

CZ309 #547 RT: 2.81 AV: 1 SB: 589 0.07-2.52, 3.00-3.53 NL: 1.20E6  
 T: + cFull.ms [40.00-550.00]

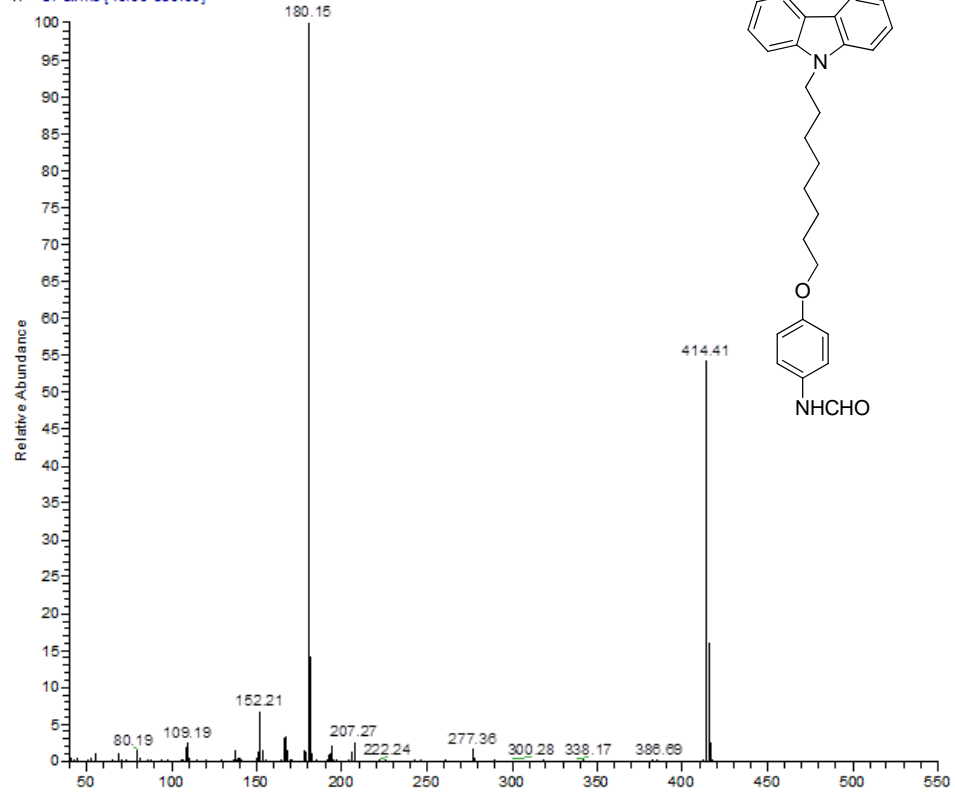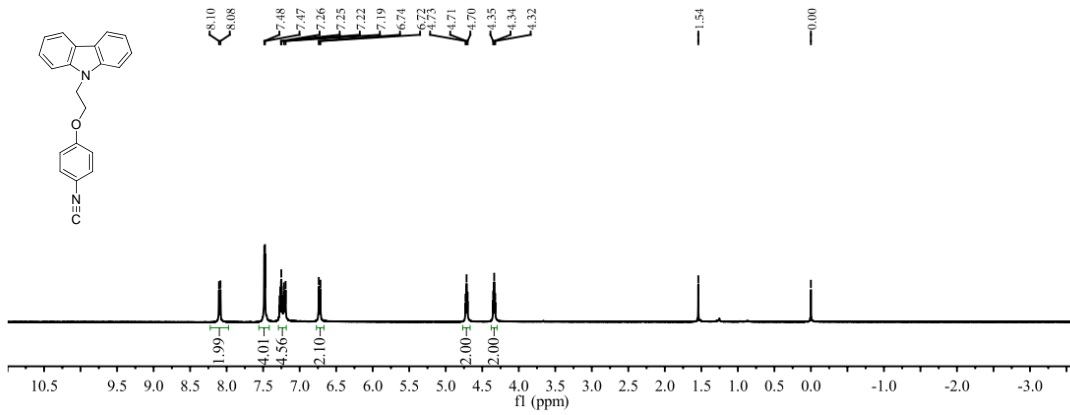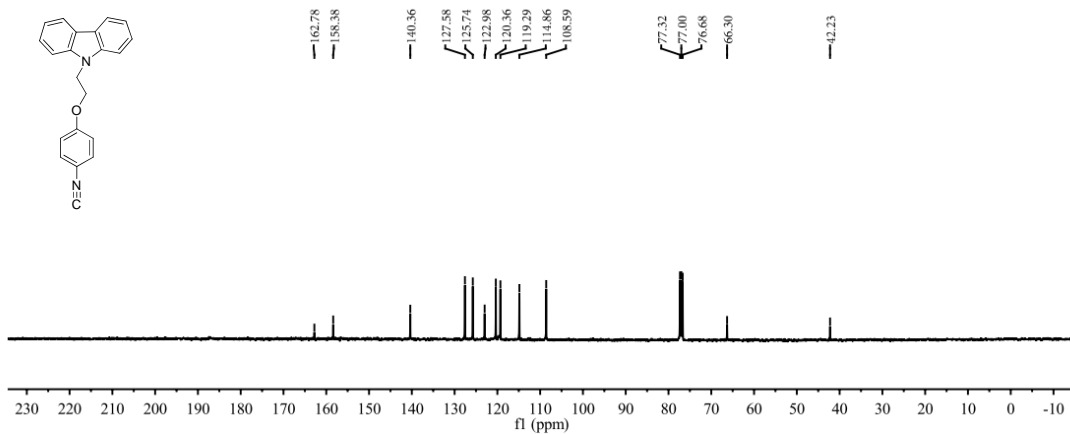

CZ325 #504 RT: 2.12 AV: 1 SB: 532 0.04-1.94, 2.37-2.67 NL: 4.75E5  
 T: + cFull.ms [40.00-450.00]

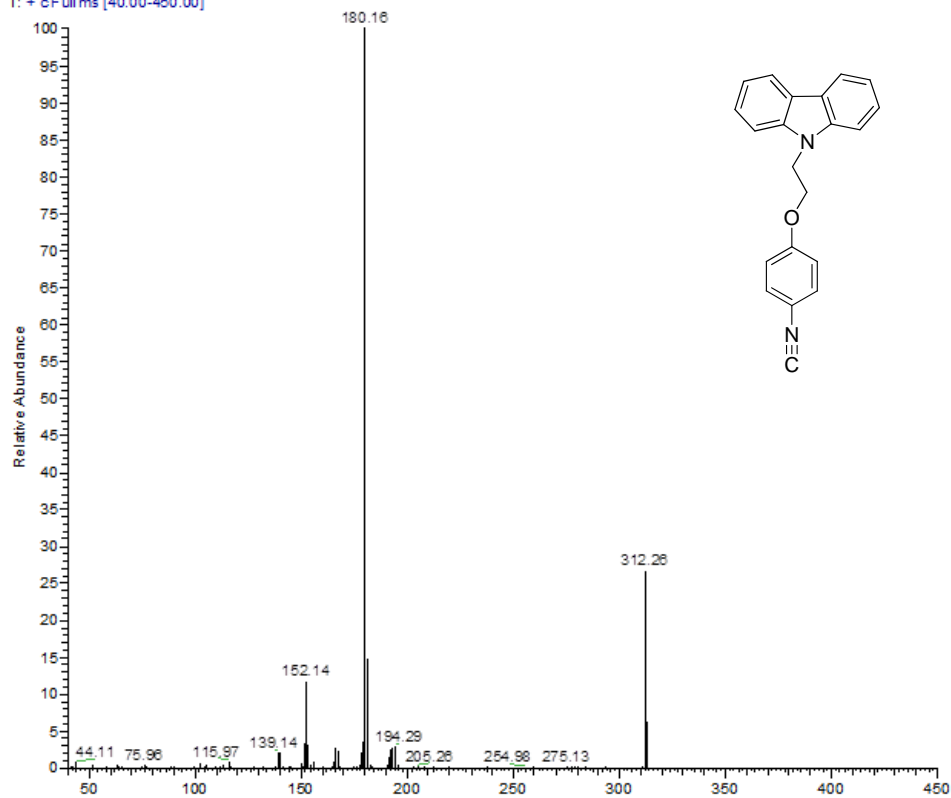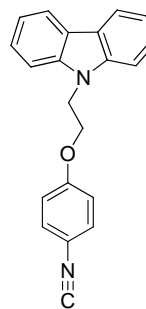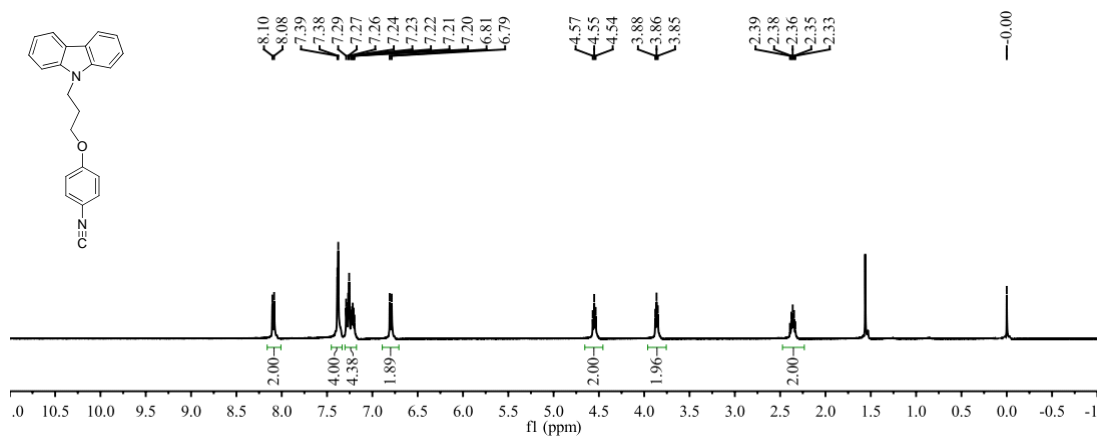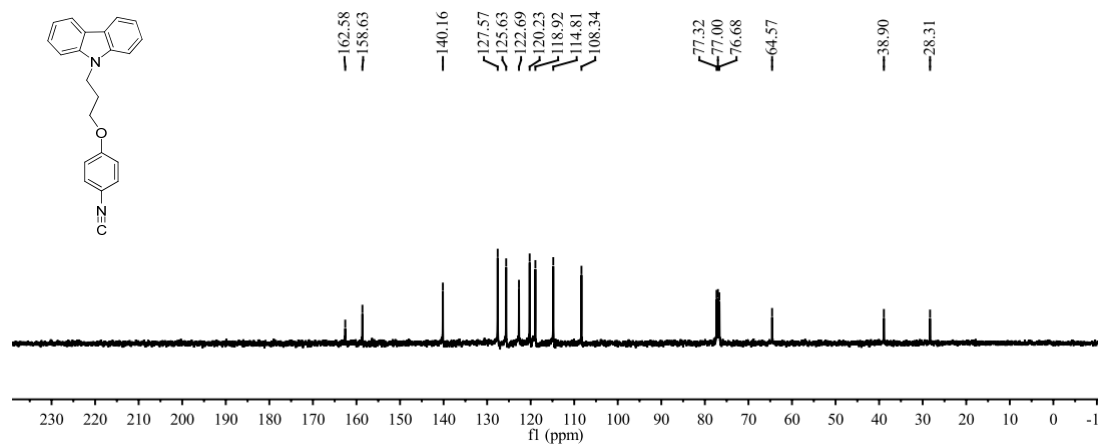

CZ369 #275 RT: 2.06 AV: 1 SB: 228 0.47-1.79 , 2.55-3.02 NL: 2.01E4  
 T: + cFullms [40.00-500.00]

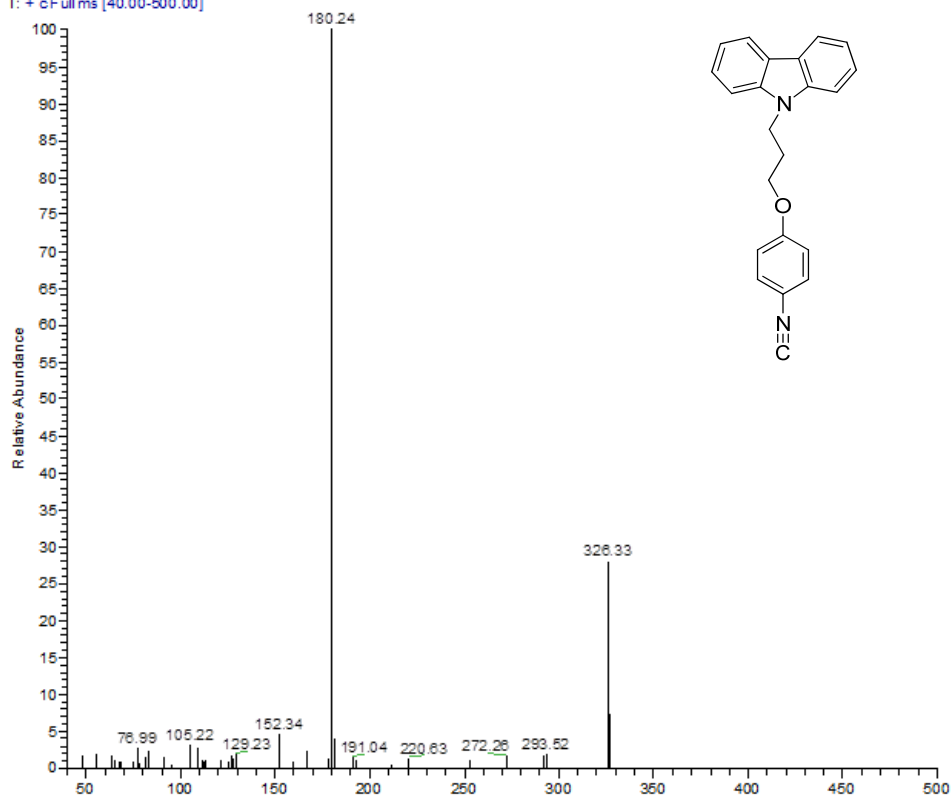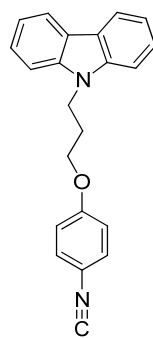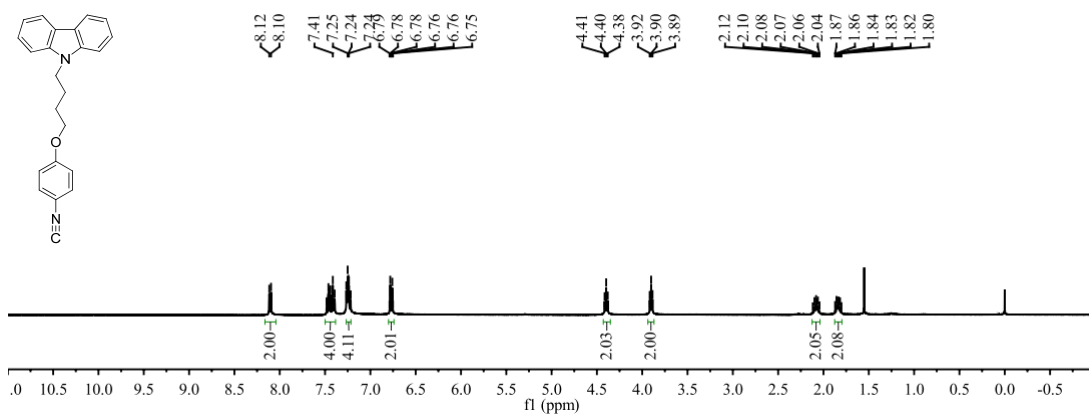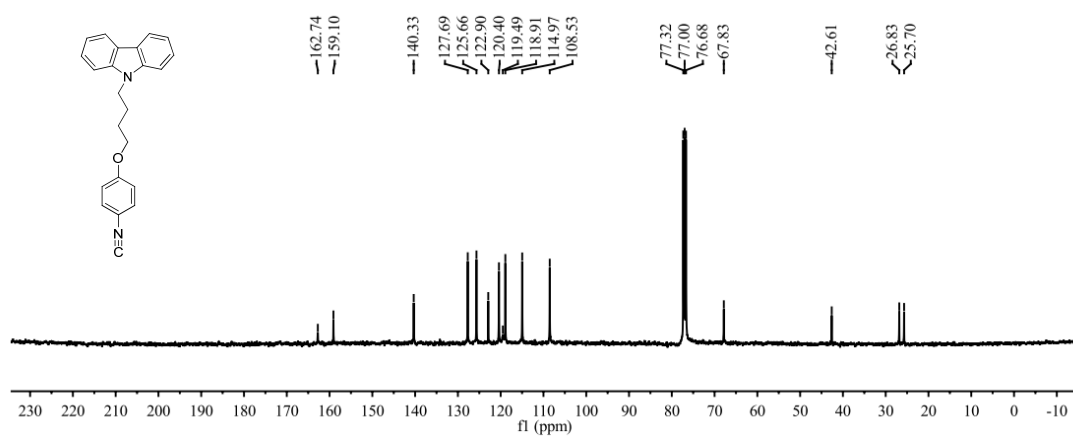

CZ311 #495 RT: 2.32 AV: 1 SB: 552 0.15-2.32, 2.87-3.23 NL: 9.15E5  
 T: + cFull.ms [40.00-500.00]

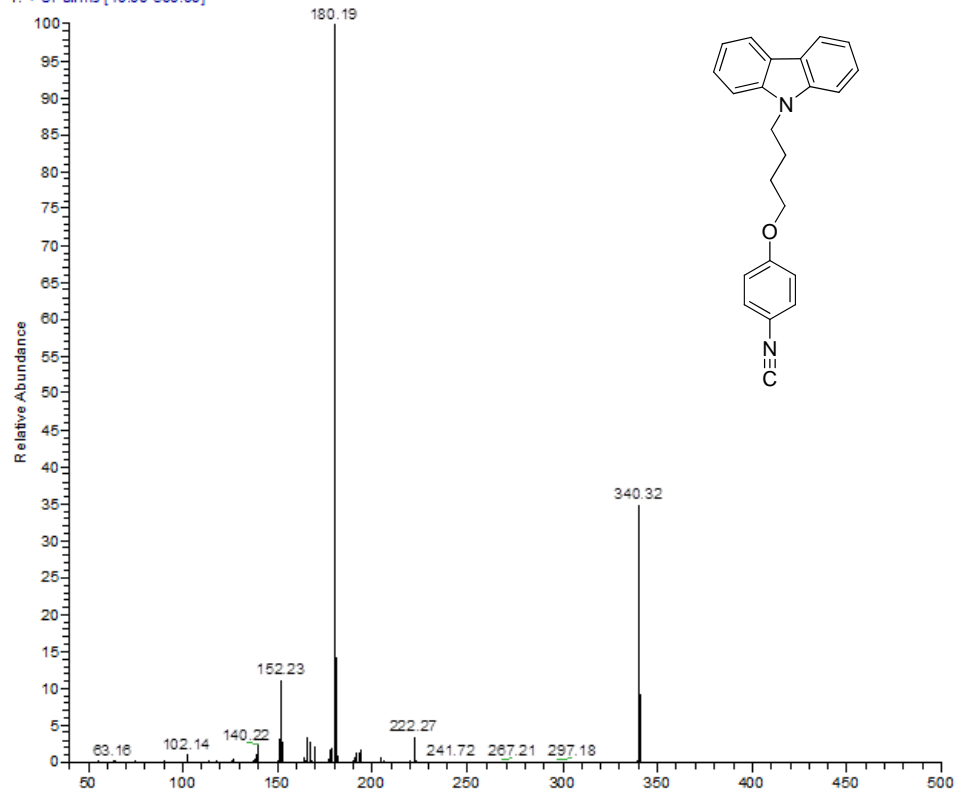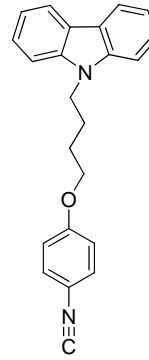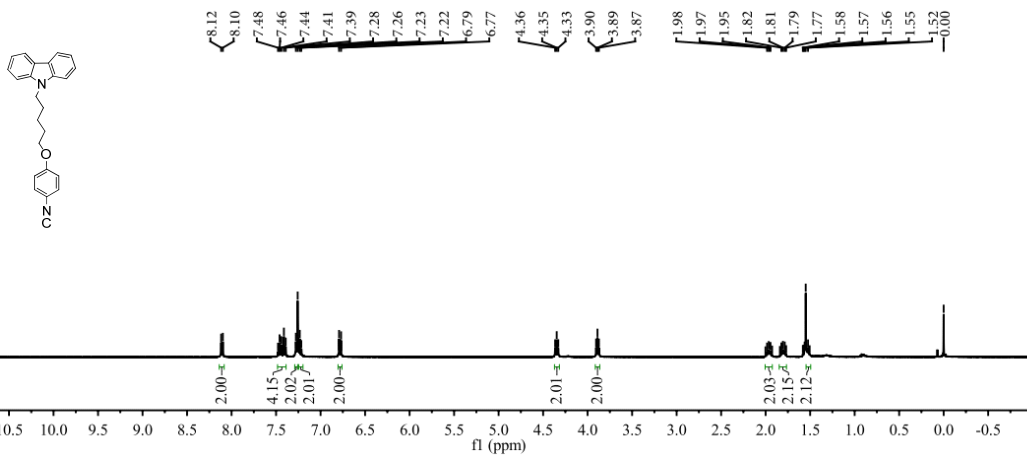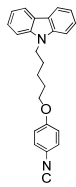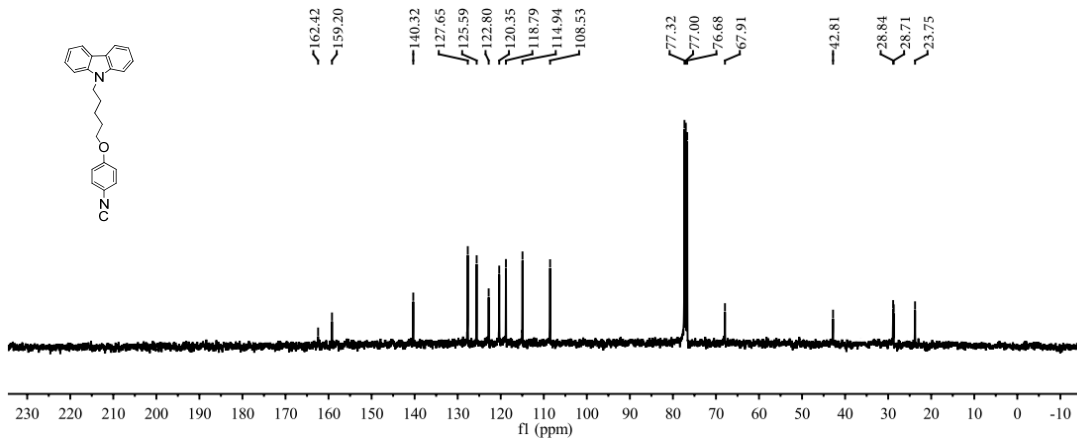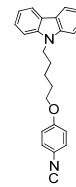

CZ339\_141119142745#355 RT: 2.40 AV: 1 SB: 252 0.92-2.18, 2.68-3.08 NL: 1.87E5  
 T: + cFull.ms [40.00-500.00]

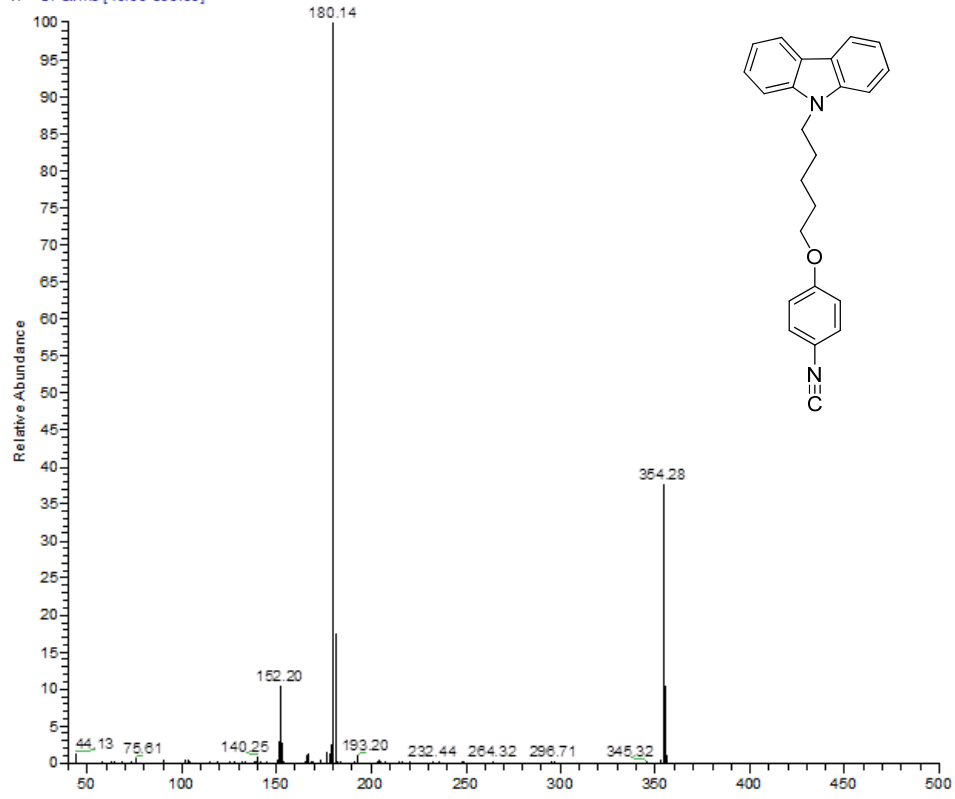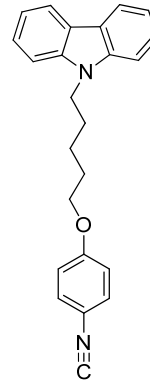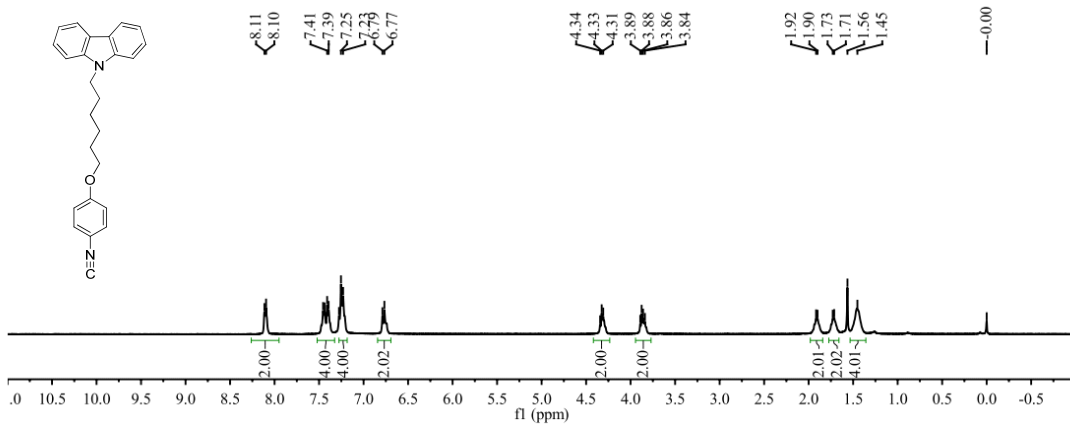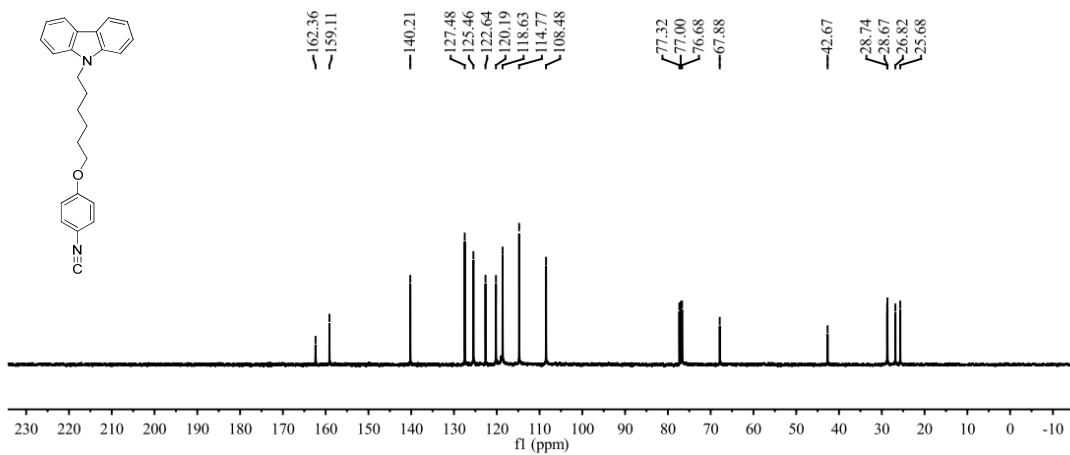

CZ237 #556 RT: 2.60 AV: 1 SB: 584 0.11-2.33, 2.84-3.30 NL: 123E6  
 T: + c Full ms [40.00-500.00]

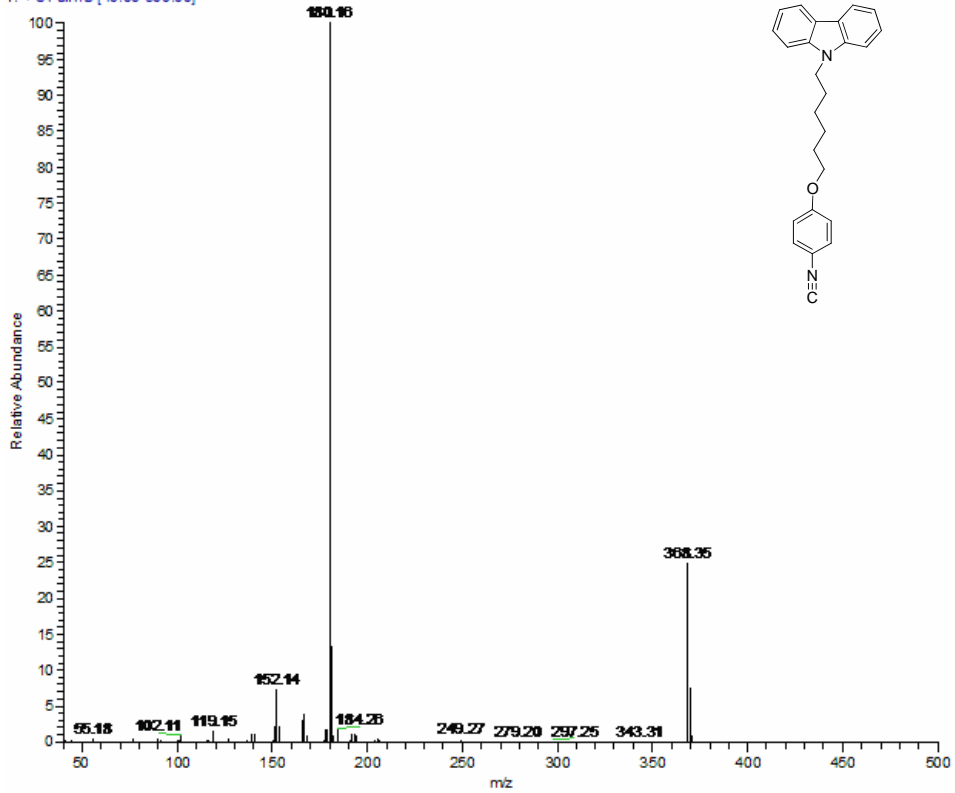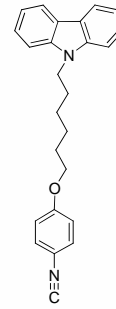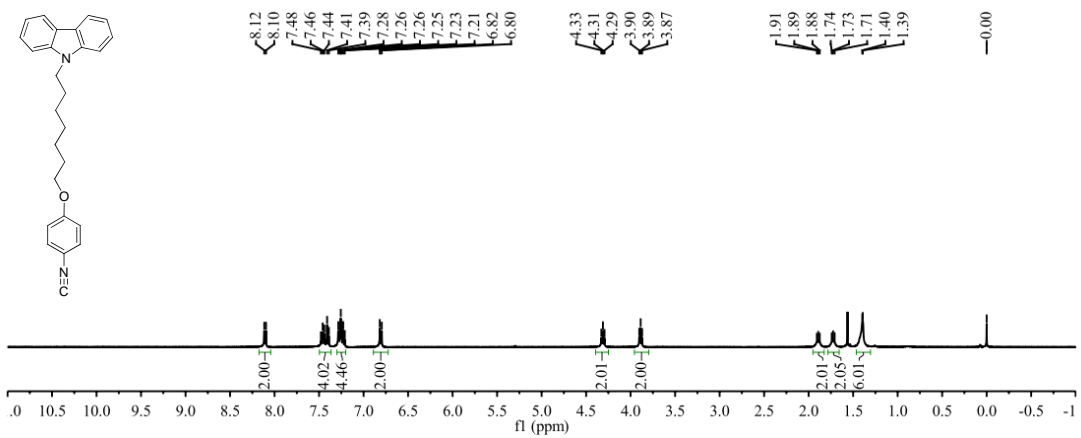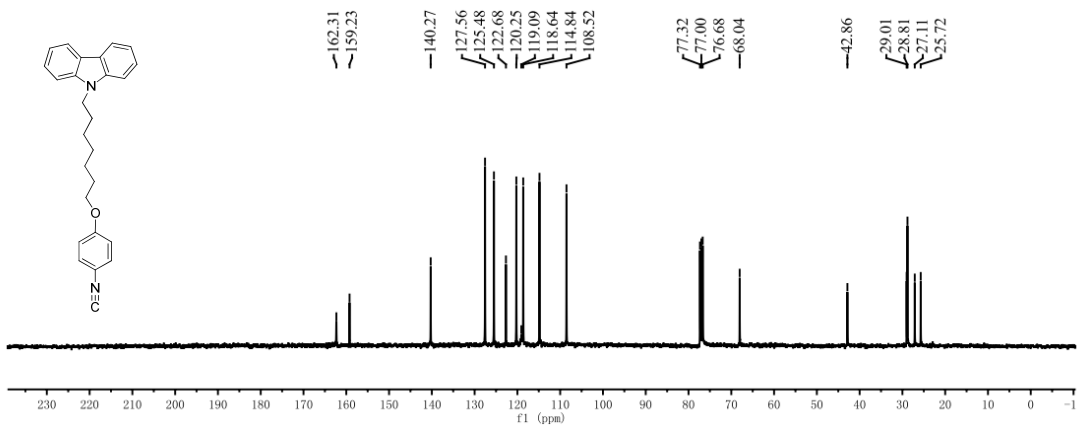

CZ378 #429 RT: 2.65 AV: 1 SB: 255 1.11-2.32, 2.94-3.22 NL: 1.10E6  
 T: + o Full ms [40.00-500.00]

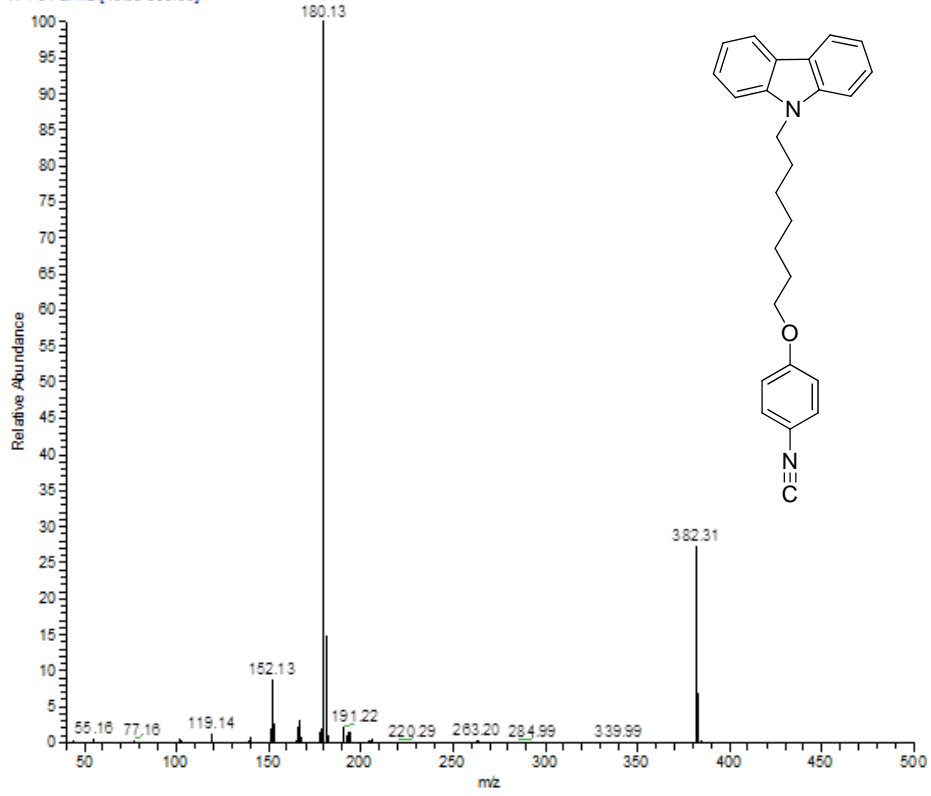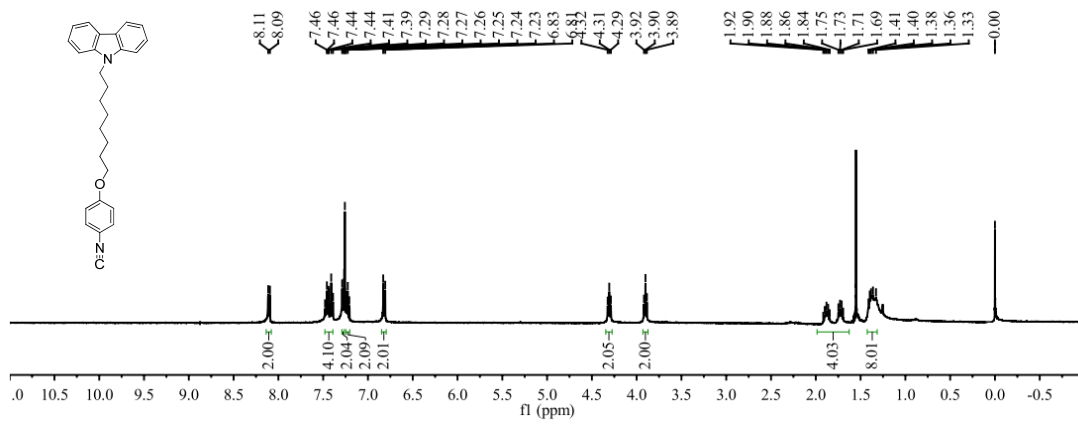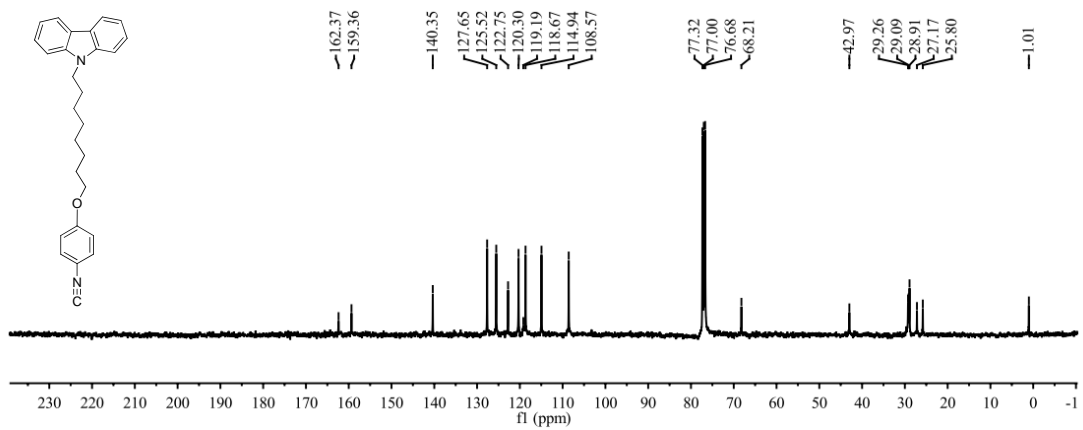



CZ313 #695 RT: 3.24 AV: 1 SB: 512 0.79-2.67, 3.36-3.83 NL: 1.17E7  
 T: + cFull.ms [40.00-500.00]

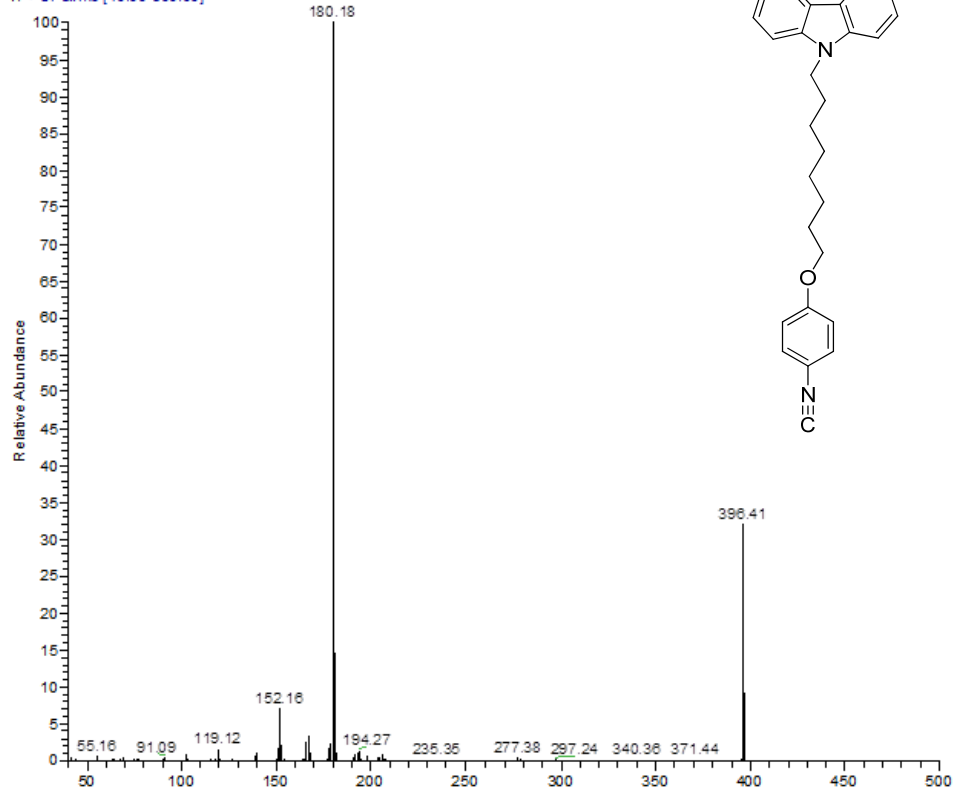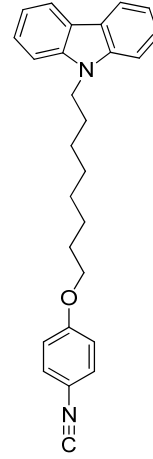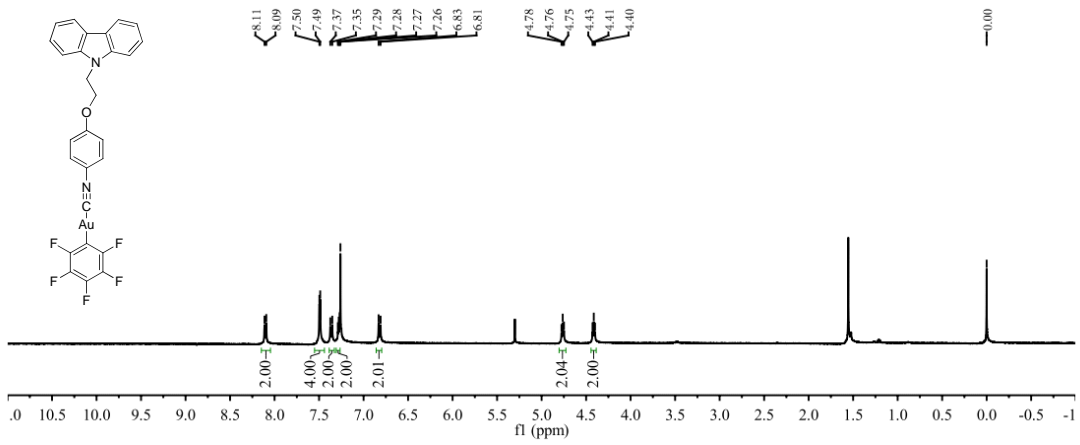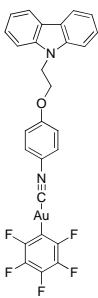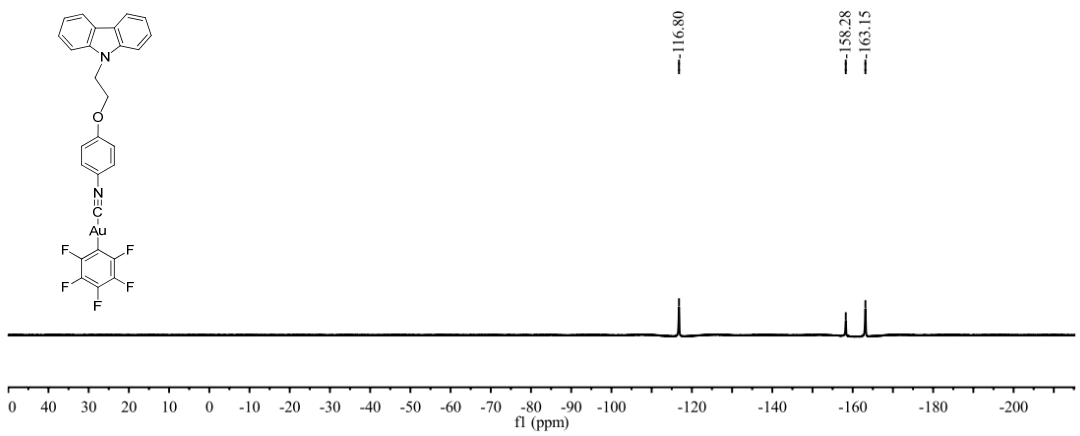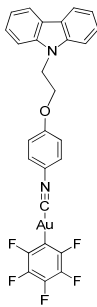

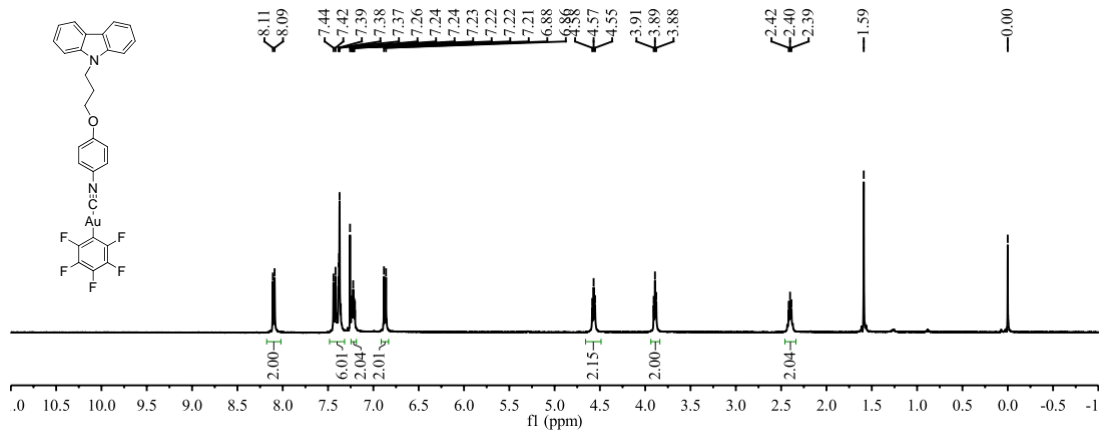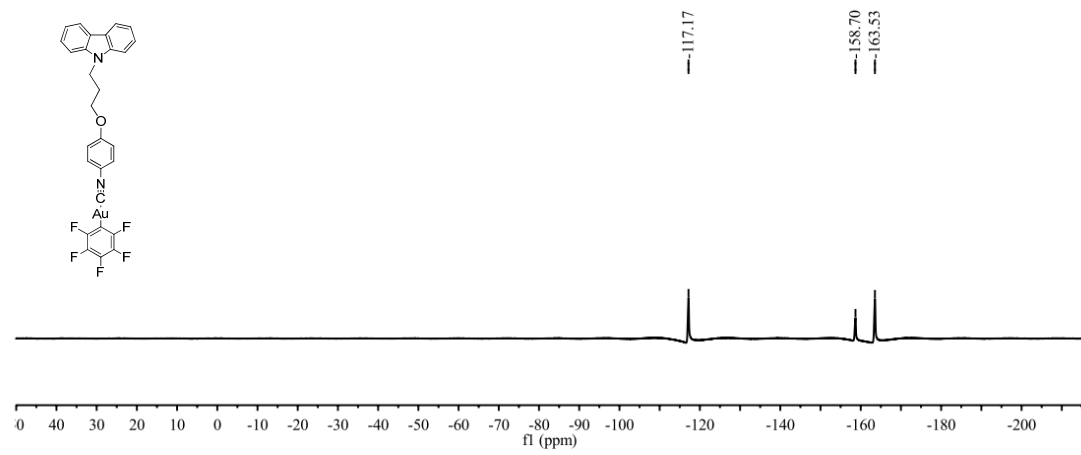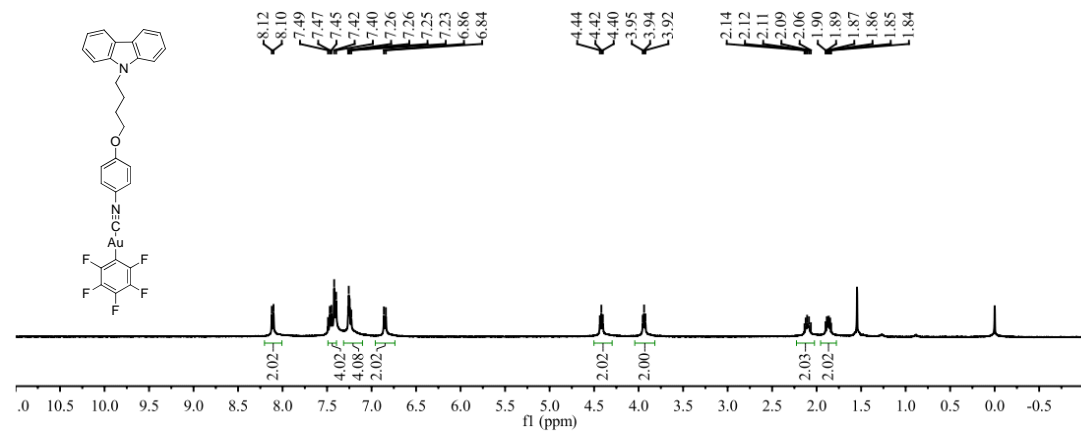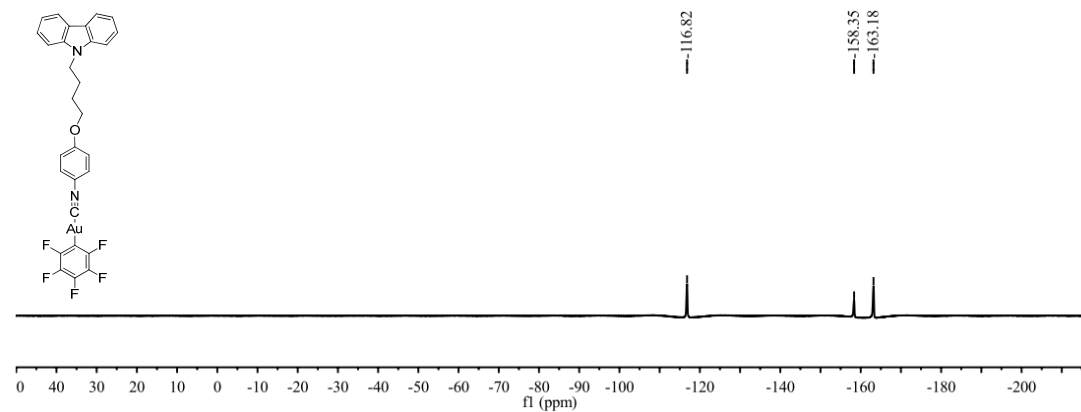

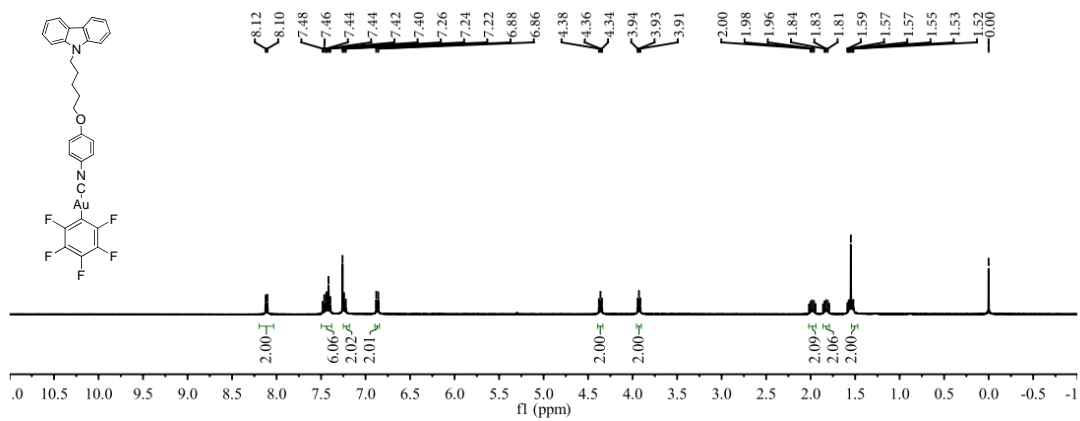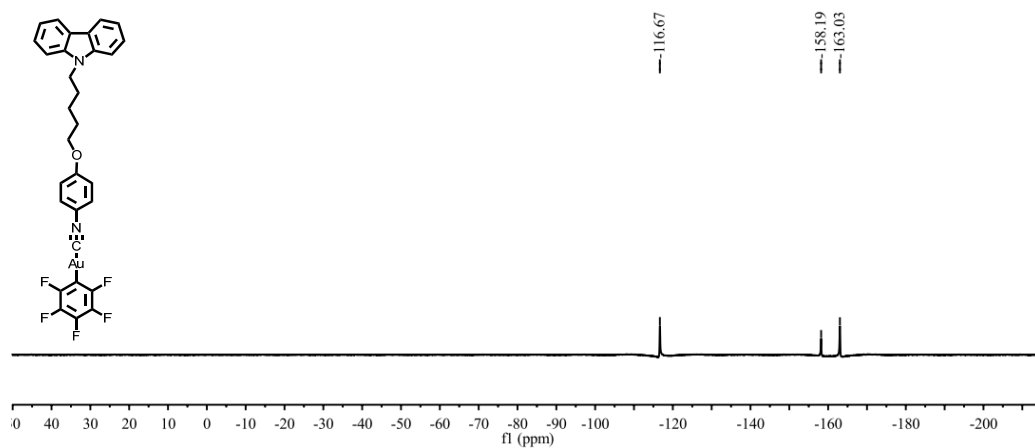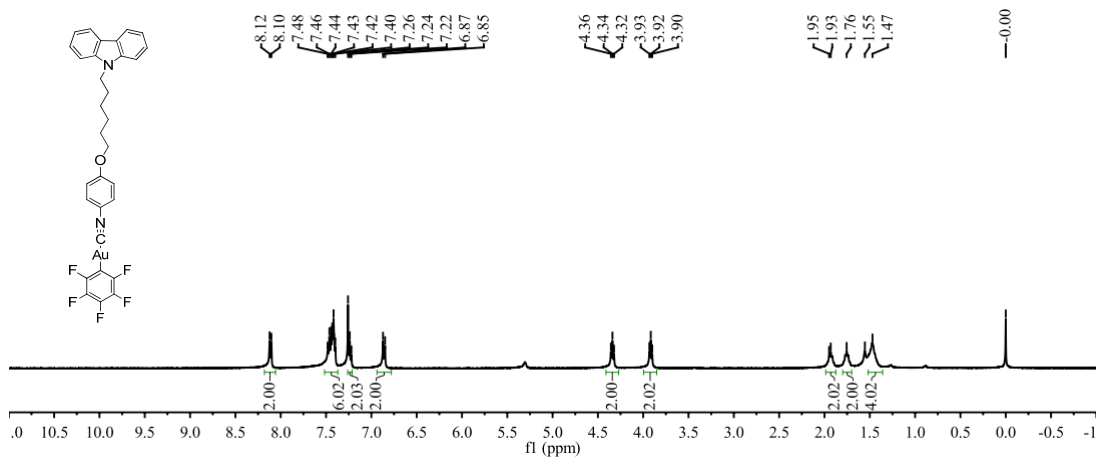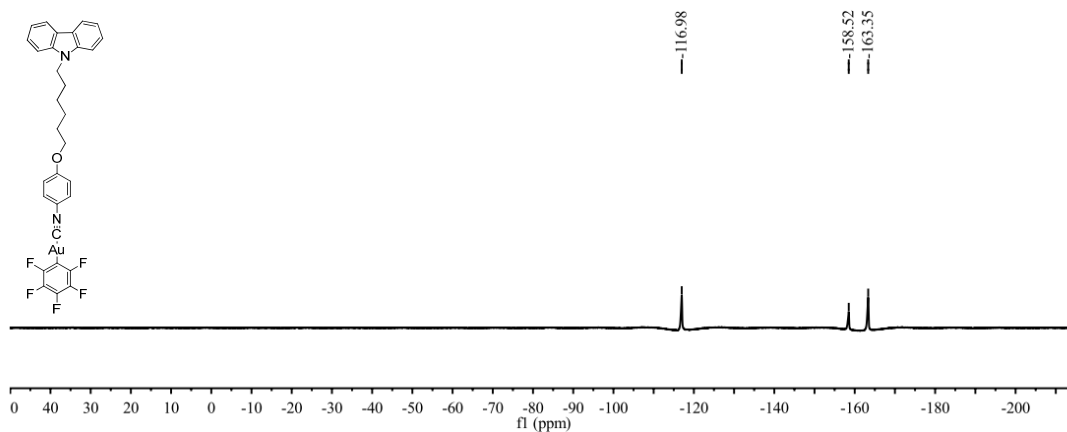

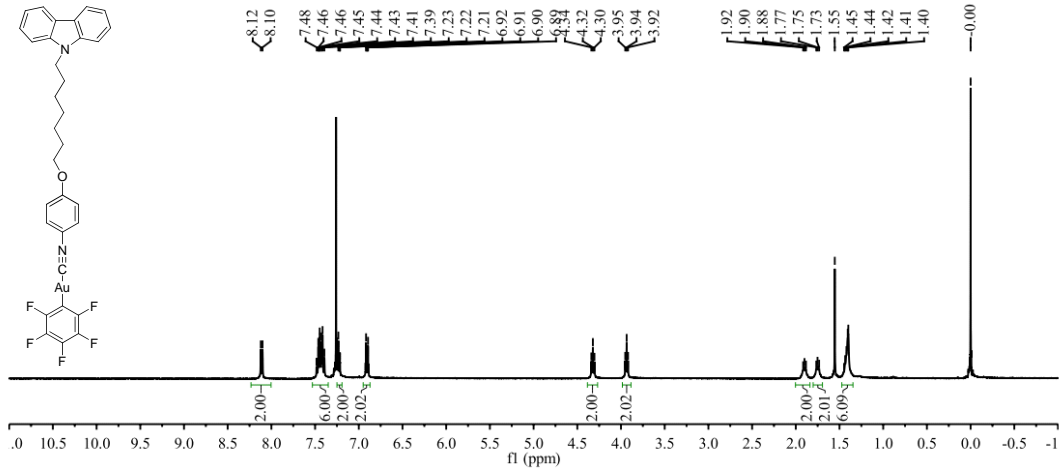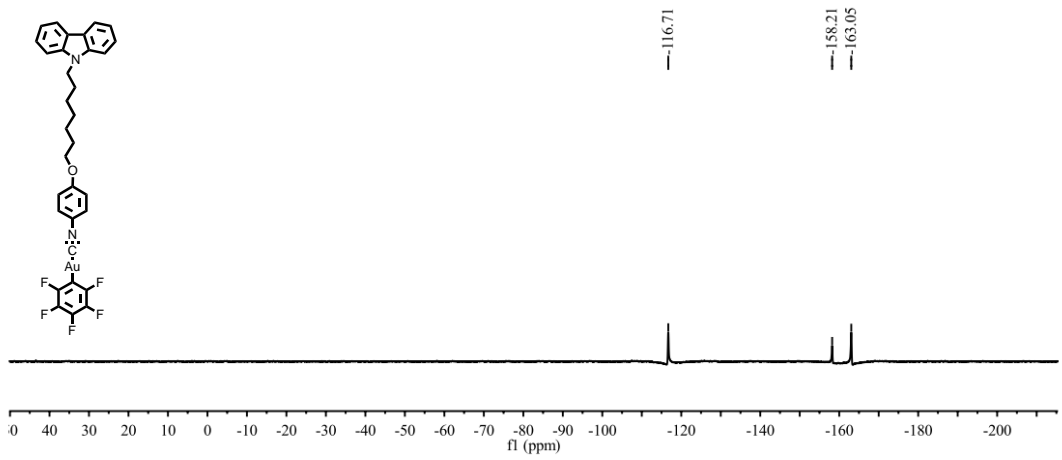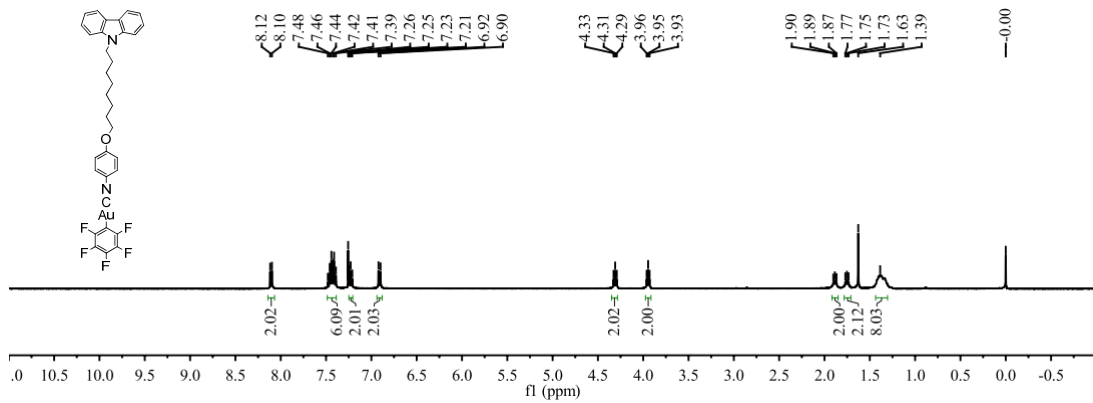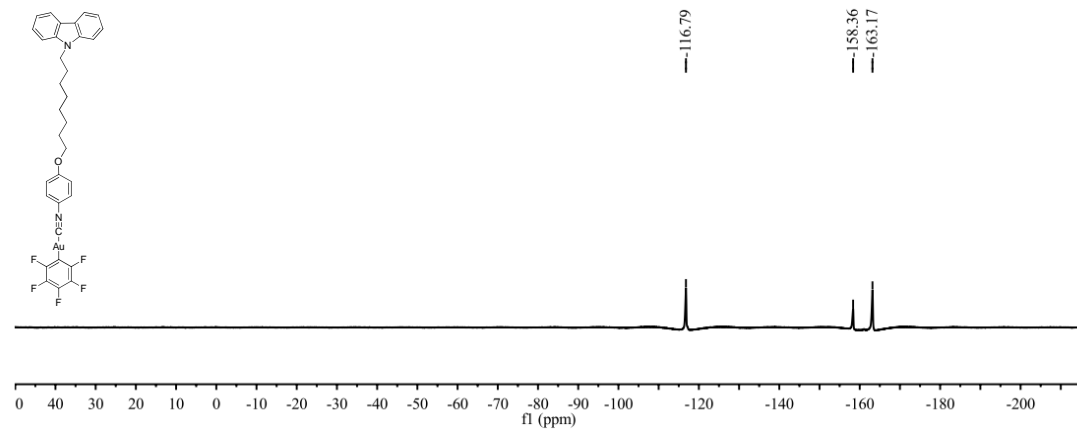

Supplement: c5ra19378h1.pdf [file c5ra19378h1.pdf]
